# Supplementary material for: Palladium-catalyzed convenient synthesis of thioesters from carboxylic acids and disulfides
Source: Royal Society of Chemistry journal article supplement (doi:10.1039/d3nj02972g), 2023-01-01

## Supporting Information

### **Palladium-catalyzed a convenient synthesis of thioesters from carboxylic acids and disulfides**

Yong-Mei Xiao,<sup>\*a</sup> Yu Zhao,<sup>a</sup> Jia-Qi Li,<sup>a</sup> Jin-Wei Yuan,<sup>a</sup> Liang-Ru Yang,<sup>a</sup> Pu Mao<sup>a</sup> and Wen-Peng Mai<sup>\*a,b</sup>

<sup>a</sup> School of Chemistry and Chemical Engineering, Henan University of Technology, Zhengzhou, 450001, China.

<sup>b</sup> School of Chemical and Printing-Dyeing Engineering, Henan University of Engineering, Zhengzhou, 450006, China.

## Table of Contents

|                                                                                                       |                |
|-------------------------------------------------------------------------------------------------------|----------------|
| <b>1. General Information.....</b>                                                                    | <b>S1</b>      |
| <b>2. General Procedure of Thioesters 3.....</b>                                                      | <b>S2</b>      |
| <b>3. Characterization of Products 3-6.....</b>                                                       | <b>S3-S11</b>  |
| <b>4. Copy of <math>^1\text{H}</math> and <math>^{13}\text{C}</math> NMR Spectra of Products.....</b> | <b>S12-S46</b> |

## 1. General Information

All experiments were carried out using schlenk-flask in N<sub>2</sub>. Carboxylic acids were purchased from commercial suppliers and used as received directly unless otherwise noted. All solvents and other commercially available reagents were purchased from Acros or TCI companies and used directly. Reactions were monitored by thin layer chromatography (TLC) (Qingdao Haiyang Chemical Co. Ltd. Silica gel 60 GF254). Products were detected using a UV/Vis lamp (254 nm). Column chromatography was performed on Qingdao Haiyang Chemical Co. Ltd. Gel 60 (200–300 mesh). The <sup>1</sup>H and <sup>13</sup>C NMR spectras were obtained on a Bruker 400 MHz NMR Fourier transform spectrometer. <sup>1</sup>H NMR data were reported as: chemical shift (δ ppm), multiplicity, coupling constant (Hz), and integration. <sup>13</sup>C NMR data were reported in terms of chemical shift (δ ppm), multiplicity, and coupling constant (Hz). The spectra are referenced against the internal solvent (CDCl<sub>3</sub>, δ <sup>1</sup>H= 7.26 ppm, <sup>13</sup>C= 77.0 ppm). <sup>1</sup>H and <sup>13</sup>C spectra were recorded on a Varian Mercury-400 MHz (400 MHz for <sup>1</sup>H, 100 MHz for <sup>13</sup>C). ESI-MS spectra were recorded on a Bruker Esquire 3000. High resolution mass spectra (HR MS) were obtained on a Waters Micromass Q-ToF Micro™ instrument using the ESI technique.

## 2. General Procedure of Thioesters 3

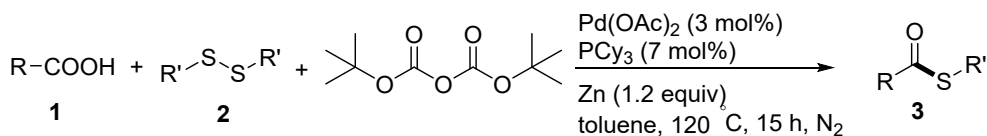

### Conditions A:

A schlenk flask (10 mL) equipped with a magnetic stir bar was charged with carboxylic acid (**1**, 0.5 mmol), disulfide (**2**, 0.6 mmol), di-tert-butyl dicarbonate (0.6 mmol), Pd(OAc)<sub>2</sub> (3 mol%), PCy<sub>3</sub> (7 mol%), Zn powder (0.6 mmol). Then the reaction flask was placed under vacuum and refilled with nitrogen for three times, following toluene (3 mL) was injected sequentially. The mixtures were allowed to react at 120 °C for 15 h. When the reaction was complete, brine water (30 mL) were added and the aqueous layer was extracted with ethyl acetate (2×20 mL), the residue was purified by flash chromatography on silica gel (eluent: petroleum ether/ethyl acetate = 100:1 to 50:1, v/v) to furnish the desired product **3**.

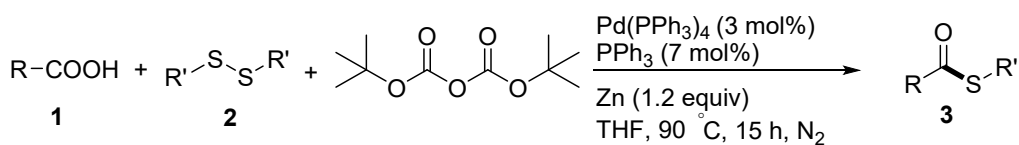

### Conditions B:

A schlenk flask (10 mL) equipped with a magnetic stir bar was charged with carboxylic acid (**1**, 0.5 mmol), disulfide (**2**, 0.6 mmol), di-tert-butyl dicarbonate (0.6 mmol), Pd(PPh<sub>3</sub>)<sub>4</sub> (3 mol%), PPh<sub>3</sub> (7 mol%), Zn powder (0.6 mmol). Then the reaction flask was placed under vacuum and refilled with nitrogen for three times, following THF (3 mL) was injected sequentially. The mixtures were allowed to react at 120 °C for 15 h. When the reaction was complete, brine water (30 mL) were added and the aqueous layer was extracted with ethyl acetate (2×20 mL), the residue was purified by flash chromatography on silica gel (eluent: petroleum ether/ethyl acetate = 100:1 to 50:1, v/v) to furnish the desired product **3**.

## 3. Characterization of Products 3-6

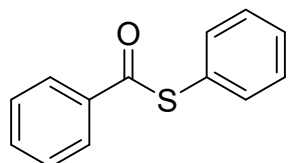**S-phenyl benzothioate (3aa)<sup>1,2</sup>**

<sup>1</sup>H NMR (400 MHz, CDCl<sub>3</sub>) δ: 8.08 (d, *J* = 8.0 Hz, 2H), 7.64 (t, *J* = 8.0 Hz, 1H), 7.48-7.56 (m, 7H); <sup>13</sup>C NMR (100 MHz, CDCl<sub>3</sub>) δ: 190.2, 136.7, 135.1, 133.7, 129.6, 129.3, 128.8, 127.5, 127.4.

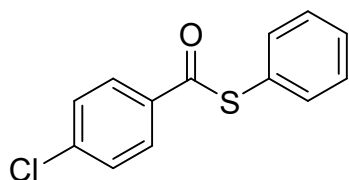**S-(phenyl) 4-chlorobenzothioate (3ba)<sup>2,4</sup>**

<sup>1</sup>H NMR (400 MHz, CDCl<sub>3</sub>) δ: 8.01 (d, *J* = 8.0 Hz, 2H), 7.48-7.56 (m, 7H); <sup>13</sup>C NMR (100 MHz, CDCl<sub>3</sub>) δ: 189.1, 140.1, 135.1, 135.0, 129.8, 129.4, 129.1, 128.9, 127.0.

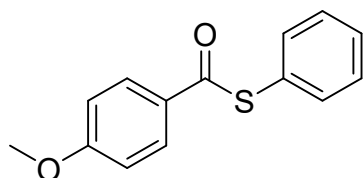**S-(phenyl) 4-methoxybenzothioate (3ca)<sup>1</sup>**

<sup>1</sup>H NMR (400 MHz, CDCl<sub>3</sub>) δ: 8.04 (d, *J* = 8.0 Hz, 2H), 7.54-7.56 (m, 2H), 7.47-7.49 (m, 3H), 6.98 (d, *J* = 8.0 Hz, 2H); 3.90 (s, 3H); <sup>13</sup>C NMR (100 MHz, CDCl<sub>3</sub>) δ: 188.6, 164.0, 135.2, 129.7, 129.4, 129.2, 127.7, 113.9, 55.6.

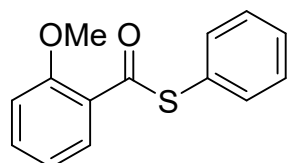**S-(phenyl) 2-methoxybenzothioate (3da)<sup>3</sup>**

<sup>1</sup>H NMR (400 MHz, CDCl<sub>3</sub>) δ: 7.90 (d, *J* = 8.0 Hz, 1H), 7.46-7.58 (m, 6 H), 7.06 (t, *J* = 8.0 Hz, 2H), 3.98 (s, 3H); <sup>13</sup>C NMR (100 MHz, CDCl<sub>3</sub>) δ: 189.2, 158.2, 135.0, 134.1, 129.9, 129.3, 129.1, 128.8, 126.4, 120.6, 112.1, 55.9.

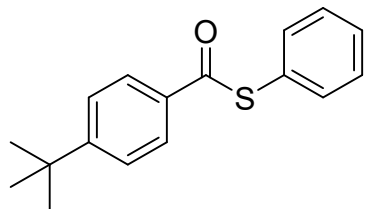

**S-(phenyl) 4-(tert-butyl)benzothioate (3ea)<sup>3,4</sup>**

<sup>1</sup>H NMR (400 MHz, CDCl<sub>3</sub>) δ: 8.03 (d, *J* = 8.0 Hz, 2H), 7.54-7.59 (m, 4H), 7.50-7.51 (m, 3H), 1.41 (s, 9H); <sup>13</sup>C NMR (100 MHz, CDCl<sub>3</sub>) δ: 189.7, 157.6, 135.2, 134.1, 129.5, 129.3, 127.6, 127.5, 125.8, 35.3, 31.1.

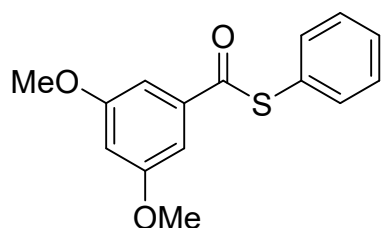

**S-(phenyl) 3,5-dimethoxybenzothioate (3fa)<sup>4</sup>**

<sup>1</sup>H NMR (400 MHz, CDCl<sub>3</sub>) δ: 7.54-7.56 (m, 2H), 7.48-7.49 (m, 3H), 7.20 (d, *J* = 2.0 Hz, 2H), 6.72 (t, *J* = 2.0 Hz, 1H), 3.86 (s, 6H); <sup>13</sup>C NMR (100 MHz, CDCl<sub>3</sub>) δ: 190.1, 160.9, 138.6, 135.1, 129.6, 127.4, 106.0, 105.2, 55.6.

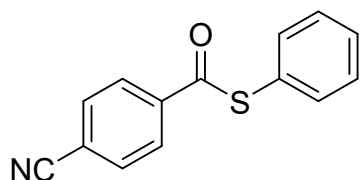

**S-(phenyl) 4-cyanobenzothioate (3ga)<sup>3</sup>**

<sup>1</sup>H NMR (400 MHz, CDCl<sub>3</sub>) δ: 8.14 (d, *J* = 8.0 Hz, 2H), 7.80 (d, *J* = 8.0 Hz, 2H), 7.51-7.53 (m, 5H); <sup>13</sup>C NMR (100 MHz, CDCl<sub>3</sub>) δ: 189.1, 139.8, 134.9, 132.7, 130.0, 129.5, 127.9, 126.2, 117.8, 116.9.

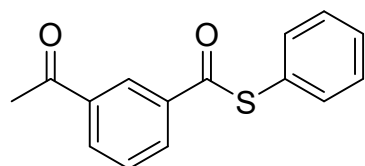

**S-(phenyl) 3-acetylbenzothioate (3ha)**

<sup>1</sup>H NMR (400 MHz, CDCl<sub>3</sub>) δ: 8.20 (t, *J* = 4.0 Hz, 1H), 8.20-8.23 (m, 2H), 7.61 (t, *J* = 8.0 Hz, 1H), 7.48-7.55 (m, 5H), 2.68 (s, 3H); <sup>13</sup>C NMR (100 MHz, CDCl<sub>3</sub>) δ: 196.9,

189.6, 137.6, 137.1, 135.0, 133.0, 131.6, 130.0, 129.4, 129.3, 127.3, 126.8, 26.7.  
HRMS(ESI):[M+H]<sup>+</sup>calcd for C<sub>15</sub>H<sub>13</sub>O<sub>2</sub>S, 257.0636; found: 257.0638.

S4

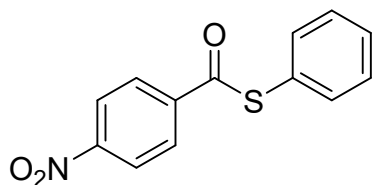

**S-(phenyl) 4-nitrobenzothioate (3ia)**

<sup>1</sup>H NMR (400 MHz, CDCl<sub>3</sub>) δ: 8.37 (d, *J* = 6.8 Hz, 2H), 8.22 (d, *J* = 9.2 Hz, 2H), 7.52-7.56 (m, 5H); <sup>13</sup>C NMR (100 MHz, CDCl<sub>3</sub>) δ: 188.9, 150.7, 141.3, 134.9, 130.1, 129.5, 128.5, 126.2, 124.0. HRMS(ESI):[M+H]<sup>+</sup> calcd for C<sub>13</sub>H<sub>10</sub>NO<sub>3</sub>S, 260.0381; found: 260.0386

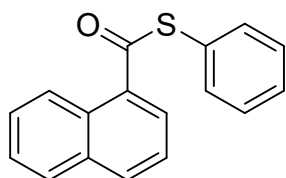

**S-(phenyl) naphthalene-1-carbonylthioate (3ja)<sup>1,3</sup>**

<sup>1</sup>H NMR (400 MHz, CDCl<sub>3</sub>) δ: 8.54 (d, *J* = 6.4 Hz, 1H), 8.22 (d, *J* = 6.4 Hz, 1H), 8.03 (d, *J* = 6.8 Hz, 1H), 7.89 (d, *J* = 6.4 Hz, 1H), 7.53-7.60 (m, 8H); <sup>13</sup>C NMR (100 MHz, CDCl<sub>3</sub>) δ: 192.3, 135.0, 134.7, 133.9, 133.3, 129.6, 129.4, 128.4, 128.3, 128.1, 128.0, 126.7, 125.3, 124.5.

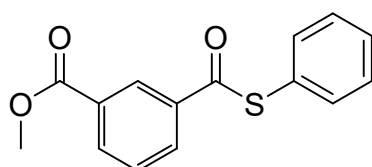

**Methyl 3-((phenylthio)carbonyl)benzoate (3ka)**

<sup>1</sup>H NMR (400 MHz, CDCl<sub>3</sub>) δ: 8.71 (t, *J* = 2.0 Hz, 1H), 8.31 (d, *J* = 7.6 Hz, 1H), 8.22 (d, *J* = 7.6 Hz, 1H), 7.61 (t, *J* = 8.0 Hz, 1H), 7.56-7.57 (m, 2H), 7.49-7.55 (m, 3H), 3.99 (s, 3H); <sup>13</sup>C NMR (100 MHz, CDCl<sub>3</sub>) δ: 189.5, 166.0, 137.0, 135.1, 134.4, 131.5, 130.9, 129.7, 129.4, 129.0, 128.6, 126.9, 52.5. HRMS(ESI):[M+H]<sup>+</sup>calcd for C<sub>15</sub>H<sub>13</sub>O<sub>3</sub>S, 273.0585; found: 273.0591.

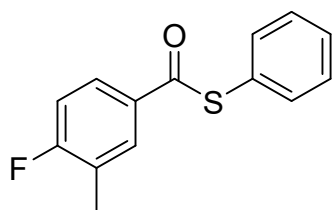

**S-(phenyl) 4-fluoro-3-methylbenzothioate (3la)**

$^1\text{H}$  NMR (400 MHz,  $\text{CDCl}_3$ )  $\delta$ : 7.80 (t,  $J = 8.0$  Hz, 2H), 7.42-7.43 (m, 2H), 7.37-7.38 (m, 3H), 7.01 (t,  $J = 8.0$  Hz, 1H), 2.26 (s, 3H);  $^{13}\text{C}$  NMR (100 MHz,  $\text{CDCl}_3$ )  $\delta$ : 187.8, 164.7, 162.6 ( $J_{\text{C-F}} = 210.0$  Hz), 134.1, 131.6, 130.1, 128.5, 128.2, 126.3, 124.8, 124.6, 114.5, 13.56. HRMS(ESI):  $[\text{M}+\text{H}]^+$  calcd for  $\text{C}_{14}\text{H}_{12}\text{FOS}$ , 247.0593; found: 247.0596.

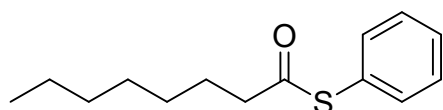**S-(phenyl) octanethioate (3ma)<sup>5</sup>**

$^1\text{H}$  NMR (400 MHz,  $\text{CDCl}_3$ )  $\delta$ : 7.44 (s, 5H), 2.69 (t,  $J = 7.6$  Hz, 2H), 1.73-1.77 (m, 2H), 1.34-1.37 (m, 8H), 0.93 (t,  $J = 7.2$  Hz, 3H);  $^{13}\text{C}$  NMR (100 MHz,  $\text{CDCl}_3$ )  $\delta$ : 197.6, 134.5, 129.1, 128.0, 43.8, 31.7, 28.9, 25.6, 22.6, 14.1.

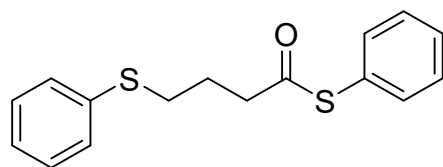**S-(phenyl) 4-(phenylthio)butanethioate (3na)**

$^1\text{H}$  NMR (400 MHz,  $\text{CDCl}_3$ )  $\delta$ : 7.44 (s, 5H), 7.39 (d,  $J = 8.0$  Hz, 2H), 7.34 (d,  $J = 8.0$  Hz, 2H), 7.24 (t,  $J = 8.0$  Hz, 2H), 3.04 (t,  $J = 8.0$  Hz, 2H), 2.88 (t,  $J = 8.0$  Hz, 2H), 2.02-2.09 (m, 2H);  $^{13}\text{C}$  NMR (100 MHz,  $\text{CDCl}_3$ )  $\delta$ : 196.9, 135.8, 134.5, 129.6, 129.4, 129.3, 129.0, 127.6, 126.3, 42.1, 32.9, 24.8. HRMS(ESI):  $[\text{M}+\text{H}]^+$  calcd for  $\text{C}_{16}\text{H}_{17}\text{OS}_2$ , 289.0721; found: 289.0725.

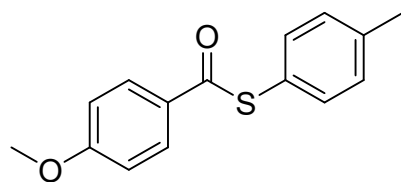**S-(p-tolyl) 4-methoxybenzothioate (3cb)<sup>4</sup>**

$^1\text{H}$  NMR (400 MHz,  $\text{CDCl}_3$ )  $\delta$ : 8.05 (d,  $J = 8.8$  Hz, 2H), 7.44 (d,  $J = 8.0$  Hz, 2H), 7.30 (d,  $J = 8.0$  Hz, 2H), 6.99 (d,  $J = 8.8$  Hz, 2H), 3.90 (s, 3H), 2.44 (s, 3H);  $^{13}\text{C}$  NMR (100 MHz,  $\text{CDCl}_3$ )  $\delta$ : 189.1, 164.0, 139.7, 135.2, 130.1, 129.7, 129.5, 124.1, 113.9, 55.6, 21.4.



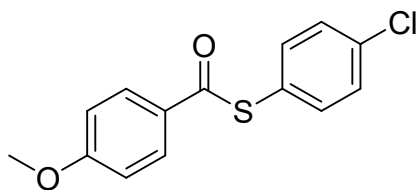

S6

**S-(4-chlorophenyl) 4-methoxybenzothioate (3cc)<sup>6</sup>**

<sup>1</sup>H NMR (400 MHz, CDCl<sub>3</sub>) δ: 8.03 (d, *J* = 8.8 Hz, 2H), 7.43-7.48 (m, 4H), 6.97 (d, *J* = 8.8 Hz, 2H), 3.90 (s, 3H); <sup>13</sup>C NMR (100 MHz, CDCl<sub>3</sub>) δ: 188.0, 164.2, 136.4, 135.8, 129.4, 126.2, 114.0, 55.6.

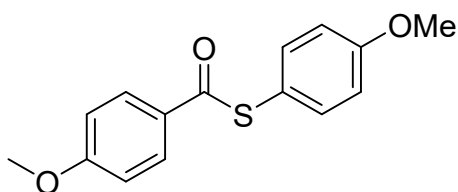

**S-(4-methoxyphenyl) 4-methoxybenzothioate (3cd)<sup>4</sup>**

<sup>1</sup>H NMR (400 MHz, CDCl<sub>3</sub>) δ: 8.04 (d, *J* = 8.8 Hz, 2H), 7.45 (d, *J* = 8.8 Hz, 2H), 6.97-7.02 (m, 4H), 3.90 (s, 3H), 3.87 (s, 3H); <sup>13</sup>C NMR (100 MHz, CDCl<sub>3</sub>) δ: 189.5, 163.9, 160.7, 136.8, 129.7, 129.5, 118.2, 114.9, 113.9, 55.6, 55.4.

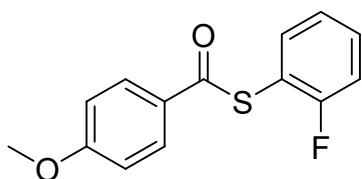

**S-(2-fluorophenyl) 4-methoxybenzothioate (3ce)**

<sup>1</sup>H NMR (400 MHz, CDCl<sub>3</sub>) δ: 8.03 (d, *J* = 8.8 Hz, 2H), 7.46-7.55 (m, 2H), 7.24-7.26 (m, 2H), 7.00 (d, *J* = 8.8 Hz, 2H), 3.89 (s, 3H); <sup>13</sup>C NMR (100 MHz, CDCl<sub>3</sub>) δ: 186.6, 164.2, 161.4 (*J*<sub>C-F</sub> = 280.0 Hz), 137.3, 132.1, 129.0, 124.7, 116.4, 115.2, 114.0, 55.6. HRMS(ESI):[M+H]<sup>+</sup>calcd for C<sub>14</sub>H<sub>12</sub>FO<sub>2</sub>S, 263.0542; found: 263.0549.

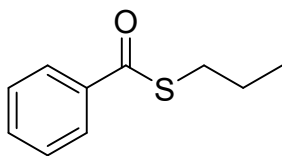

**S-(propyl) 4-benzothioate (3ag)<sup>7</sup>**

<sup>1</sup>H NMR (400 MHz, CDCl<sub>3</sub>) δ: 8.01 (d, *J* = 8.0 Hz, 2H), 7.59 (t, *J* = 8.0 Hz, 1H), 7.45 (t, *J* = 8.0 Hz, 1H), 3.08 (t, *J* = 8.0 Hz, 2H), 1.71-1.76 (m, 2H), 1.06 (t, *J* = 8.0 Hz, 3H); <sup>13</sup>C NMR (100 MHz, CDCl<sub>3</sub>) δ: 192.2, 137.3, 133.2, 128.6, 127.2, 30.9, 23.0, 13.5.

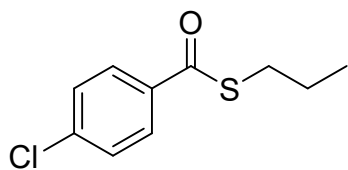

S7

**S-(propyl) benzothioate (3bg)**

$^1\text{H}$  NMR (400 MHz,  $\text{CDCl}_3$ )  $\delta$ : 7.94 (d,  $J = 8.0$  Hz, 2H), 7.42 (d,  $J = 8.0$  Hz, 2H), 3.07 (t,  $J = 8.0$  Hz, 2H), 1.70-1.75 (m, 2H), 1.05 (t,  $J = 8.0$  Hz, 3H);  $^{13}\text{C}$  NMR (100 MHz,  $\text{CDCl}_3$ )  $\delta$ : 191.0, 139.6, 135.6, 128.9, 128.6, 31.1, 22.9, 13.5.

HRMS(ESI): $[\text{M}+\text{H}]^+$ calcd for  $\text{C}_{10}\text{H}_{12}\text{ClOS}$ , 215.0297; found: 215.0292.

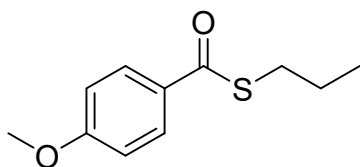

**S-(propyl) 4-methoxybenzothioate (3cg)<sup>4</sup>**

$^1\text{H}$  NMR (400 MHz,  $\text{CDCl}_3$ )  $\delta$ : 7.98 (d,  $J = 8.0$  Hz, 2H), 6.95 (d,  $J = 8.0$  Hz, 2H), 3.88 (s, 3H), 3.05 (t,  $J = 8.0$  Hz, 2H), 1.69-1.74 (m, 2H), 1.05 (t,  $J = 8.0$  Hz, 3H);  $^{13}\text{C}$  NMR (100 MHz,  $\text{CDCl}_3$ )  $\delta$ : 190.7, 163.6, 130.2, 129.3, 113.7, 55.5, 30.8, 23.1, 13.5.

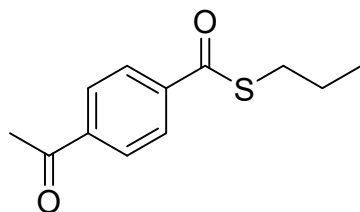

**S-(propyl) 4-acetylbenzothioate (3og)<sup>7</sup>**

$^1\text{H}$  NMR (400 MHz,  $\text{CDCl}_3$ )  $\delta$ : 8.01-8.07 (m, 4H), 3.10 (t,  $J = 8.0$  Hz, 2H), 2.66 (s, 3H), 1.71-1.77 (m, 2H), 1.06 (t,  $J = 8.0$  Hz, 3H);  $^{13}\text{C}$  NMR (100 MHz,  $\text{CDCl}_3$ )  $\delta$ : 197.4, 191.5, 140.5, 140.31, 128.5, 127.4, 31.2, 26.9, 22.9, 13.5.

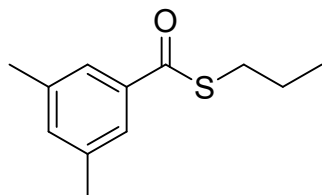

**S-(propyl) 3,5-dimethylbenzothioate (3pg)**

$^1\text{H}$  NMR (400 MHz,  $\text{CDCl}_3$ )  $\delta$ : 7.60 (s, 2H), 7.21 (s, 1H), 3.06 (t,  $J = 8.0$  Hz, 2H), 2.38 (s, 6H), 1.69-1.75 (m, 2H), 1.06 (t,  $J = 8.0$  Hz, 3H);  $^{13}\text{C}$  NMR (100 MHz,  $\text{CDCl}_3$ )  $\delta$ : 192.4, 138.3, 137.4, 134.9, 124.9, 30.9, 23.0, 21.21, 13.5.

HRMS(ESI): $[\text{M}+\text{H}]^+$ calcd for  $\text{C}_{12}\text{H}_{17}\text{OS}$ , 209.1000; found: 209.1010.

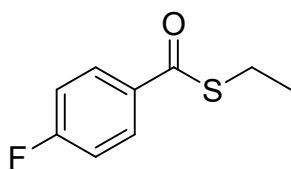

S8

**S-(ethyl) 4-fluorobenzothioate (3qh)**

$^1\text{H}$  NMR (400 MHz,  $\text{CDCl}_3$ )  $\delta$ : 8.02 (dd,  $J = 8.0$  Hz,  $J' = 4.0$  Hz, 2H), 7.14 (t,  $J = 8.0$  Hz, 2H), 3.11 (q,  $J = 8.0$  Hz, 2H), 1.38 (t,  $J = 8.0$  Hz, 3H);  $^{13}\text{C}$  NMR (100 MHz,  $\text{CDCl}_3$ )  $\delta$ : 190.6, 167.1, 164.6, 133.6, 129.7, 115.8, 23.6, 14.7.

HRMS(ESI): $[\text{M}+\text{H}]^+$ calcd for  $\text{C}_9\text{H}_{10}\text{FOS}$ , 185.0436; found: 185.0439.

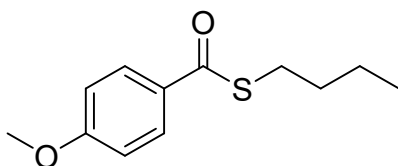

**S-(butyl) 4-methoxybenzothioate (3ci)<sup>4</sup>**

$^1\text{H}$  NMR (400 MHz,  $\text{CDCl}_3$ )  $\delta$ : 7.96 (d,  $J = 8.0$  Hz, 2H), 6.94 (d,  $J = 8.0$  Hz, 2H), 3.87 (s, 3H), 3.07 (t,  $J = 8.0$  Hz, 2H), 1.63-1.70 (m, 2H), 1.44-1.51 (m, 2H), 0.96 (t,  $J = 8.0$  Hz, 3H);  $^{13}\text{C}$  NMR (100 MHz,  $\text{CDCl}_3$ )  $\delta$ : 190.7, 163.6, 130.2, 129.3, 113.7, 55.5, 31.8, 28.6, 22.1, 13.6.

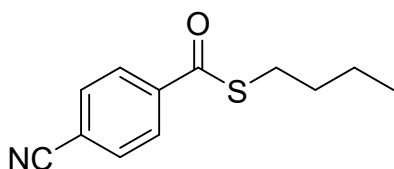

**S-(butyl) 4-cyanobenzothioate (3gi)**

$^1\text{H}$  NMR (400 MHz,  $\text{CDCl}_3$ )  $\delta$ : 8.06 (d,  $J = 8.0$  Hz, 2H), 7.74 (d,  $J = 8.0$  Hz, 2H), 3.11 (t,  $J = 8.0$  Hz, 2H), 1.64-1.71 (m, 2H), 1.42-1.51 (m, 2H), 0.96 (t,  $J = 8.0$  Hz, 3H);  $^{13}\text{C}$  NMR (100 MHz,  $\text{CDCl}_3$ )  $\delta$ : 190.8, 140.3, 132.5, 127.6, 117.9, 116.5, 31.4, 29.2, 22.0, 13.6. HRMS(ESI): $[\text{M}+\text{H}]^+$ calcd for  $\text{C}_{12}\text{H}_{14}\text{NOS}$ , 220.0796; found: 220.0801.

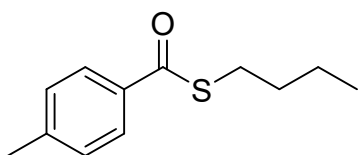

**S-(butyl) 4-methylbenzothioate (3ri)**

$^1\text{H}$  NMR (400 MHz,  $\text{CDCl}_3$ )  $\delta$ : 7.80 (d,  $J = 6.4$  Hz, 2H), 7.15 (d,  $J = 6.4$  Hz, 2H), 2.99 (t,  $J = 5.6$  Hz, 2H), 2.33 (s, 3H), 1.56-1.59 (m, 2H), 1.38-1.40 (m, 2H), 0.87 (t,  $J = 5.6$  Hz, 3H);  $^{13}\text{C}$  NMR (100 MHz,  $\text{CDCl}_3$ )  $\delta$ : 191.8, 144.0, 134.8, 129.2, 127.2, 31.7, 28.7, 22.1, 21.7, 13.7. HRMS(ESI): $[\text{M}+\text{H}]^+$ calcd for  $\text{C}_{12}\text{H}_{17}\text{OS}$ , 209.1000; found: 209.1007.

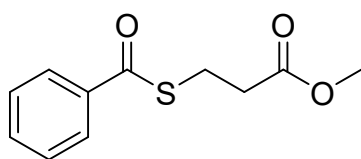

S9

**Methyl 3-(benzoylthio)propanoate (3aj)<sup>7</sup>**

<sup>1</sup>H NMR (400 MHz, CDCl<sub>3</sub>) δ: 7.97 (d, *J* = 8.0 Hz, 2H), 7.58 (t, *J* = 8.0 Hz, 1H), 7.45 (t, *J* = 8.0 Hz, 2H), 3.72 (s, 3H), 3.33 (t, *J* = 8.0 Hz, 2H), 2.75 (t, *J* = 8.0 Hz, 2H); <sup>13</sup>C NMR (100 MHz, CDCl<sub>3</sub>) δ: 191.5, 172.2, 136.8, 133.5, 128.6, 127.2, 51.9, 34.3, 24.0.

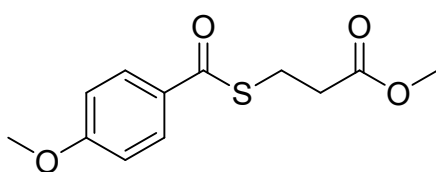

**Methyl 3-((4-methoxybenzoyl)thio)propanoate (3cj)<sup>7</sup>**

<sup>1</sup>H NMR (400 MHz, CDCl<sub>3</sub>) δ: 7.93 (d, *J* = 9.2 Hz, 2H), 6.91 (d, *J* = 8.8 Hz, 2H), 3.84 (s, 3H), 3.69 (s, 3H), 3.28 (t, *J* = 6.8 Hz, 2H), 2.74 (t, *J* = 6.8 Hz, 2H); <sup>13</sup>C NMR (100 MHz, CDCl<sub>3</sub>) δ: 189.9, 172.2, 163.8, 129.8, 113.8, 55.5, 51.9, 34.4, 23.9.

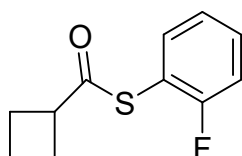

**S-(2-fluorophenyl) cyclobutanecarbothioate (3se)**

<sup>1</sup>H NMR (400 MHz, CDCl<sub>3</sub>) δ: 8.03 (d, *J* = 8.8 Hz, 2H), 7.46-7.55 (m, 2H), 7.24-7.26 (m, 2H), 7.00 (d, *J* = 8.8 Hz, 2H), 3.89 (s, 3H); <sup>13</sup>C NMR (100 MHz, CDCl<sub>3</sub>) δ: 197.5, 163.4, 160.9 (*J*<sub>C-F</sub> = 250.0 Hz), 136.8, 131.9, 124.6, 116.3, 115.2, 46.6, 26.1, 18.0. HRMS(ESI):[M+H]<sup>+</sup> calcd for C<sub>11</sub>H<sub>12</sub>FOS, 211.0593; found: 211.0598.

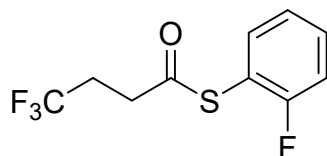

**S-(2-fluorophenyl) 4,4,4-trifluorobutanethioate (3te)**

<sup>1</sup>H NMR (400 MHz, CDCl<sub>3</sub>) δ: 7.42-7.50 (m, 2H), 7.19-7.28 (m, 2H), 2.99 (t, *J* = 7.2 Hz, 2H), 2.52-2.58 (m, 2H); <sup>13</sup>C NMR (100 MHz, CDCl<sub>3</sub>) δ: 192.7, 163.3, 160.8 (*J*<sub>C-F</sub> = 250.0 Hz), 136.6, 132.6, 127.7, 124.8, 116.2, 114.3, 35.7, 29.4. HRMS(ESI):[M+H]<sup>+</sup> calcd for C<sub>10</sub>H<sub>9</sub>F<sub>4</sub>OS, 253.0310; found: 253.0316.

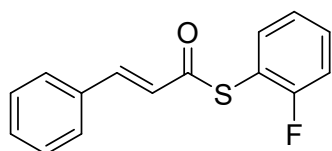

**S-(2-fluorophenyl) (E)-3-phenylprop-2-enethioate (3ue)**

$^1\text{H}$  NMR (400 MHz,  $\text{CDCl}_3$ )  $\delta$ : 7.71 (d,  $J = 16.0$  Hz, 1H), 7.59-7.61 (m, 2H), 7.43-7.52 (m, 5H), 7.24-7.27 (m, 2H), 6.86 (d,  $J = 15.6$  Hz, 1H), 7.00 (d,  $J = 8.8$  Hz, 2H), 3.89 (s, 3H);  $^{13}\text{C}$  NMR (100 MHz,  $\text{CDCl}_3$ )  $\delta$ : 186.1, 163.5, 161.1 ( $J_{\text{C-F}} = 240.0$  Hz), 142.3, 136.8, 133.9, 132.2, 130.9, 129.1, 128.6, 124.7, 123.8, 116.3.

HRMS(ESI): $[\text{M}+\text{H}]^+$  calcd for  $\text{C}_{15}\text{H}_{12}\text{FOS}$ , 259.0593; found: 259.0595.

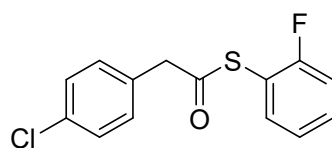

**S-(2-fluorophenyl) 2-(4-chlorophenyl)ethanethioate (3ve)**

$^1\text{H}$  NMR (400 MHz,  $\text{CDCl}_3$ )  $\delta$ : 7.35 (d,  $J = 4.0$  Hz, 1H), 7.46-7.55 (m, 2H), 7.24-7.28 (m, 3H), 7.06 (t,  $J = 4.0$  Hz, 2H);  $^{13}\text{C}$  NMR (100 MHz,  $\text{CDCl}_3$ )  $\delta$ : 193.1, 163.1, 161.1 ( $J_{\text{C-F}} = 200.0$  Hz), 136.5, 133.7, 132.3, 131.4, 131.0, 128.9, 124.7, 116.3, 115.0, 49.1. HRMS(ESI): $[\text{M}+\text{H}]^+$  calcd for  $\text{C}_{14}\text{H}_{11}\text{ClFOS}$ , 281.0203; found: 281.0211.

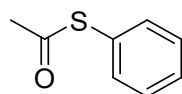

**S-(phenyl) ethanethioate (4)<sup>3</sup>**

$^1\text{H}$  NMR (400 MHz,  $\text{CDCl}_3$ )  $\delta$ : 7.45 (m, 5H), 2.45 (s, 3H);  $^{13}\text{C}$  NMR (100 MHz,  $\text{CDCl}_3$ )  $\delta$ : 194.1, 134.5, 129.5, 129.3, 128.0, 30.2.

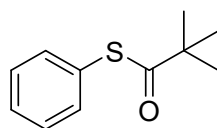

**S-(phenyl) 2,2-dimethylpropanethioate (5)<sup>8</sup>**

$^1\text{H}$  NMR (400 MHz,  $\text{CDCl}_3$ )  $\delta$ : 7.43 (s, 5H), 1.35 (s, 9H);  $^{13}\text{C}$  NMR (100 MHz,  $\text{CDCl}_3$ )  $\delta$ : 204.7, 135.0, 129.1, 129.0, 128.1, 46.9, 27.4.

**Reference**

1. N. Ichiishi, C A. MalapitOrcid, Ł Woźniak and M. S. Sanford, *Org. Lett.* 2018, 20, 1, 44–47.
2. J.-X Xu, L.-C. Wang and X.-F. Wu, *Org. Lett.* 2022, 24, 26, 4820–4824.
3. J. Xu, F. Lu, L. Sun, M. Huang, J. Jiang, K Wang, D. Ouyang, L. Lu, A. Lei, *Green. Chem.* 2022,24, 7350-7354.
4. S. Xie, L. Su, M. Mo, W. Zhou, Y. Zhou and J. Dong, *J. Org. Chem.* 2021, 86,

- 1, 739–749.
5. K. Danielle, M. Sudheendran, W. Chen, W. Brady, B. Christopher N, *Chem. Commun*, 2018, 54, 58, 8108 – 8111.
  6. Y. Man, X. Zeng, B. Xu, *Chem–A. Eur. J*, 2023, 29, 17, E202203716.
  7. Y. M. Xiao, W. W. Lv, J. W. Yuan, L. R. Yang, P. Mao, W. P. Mai, *Chemistryselect*, 2022, 7, e202200914.
  8. F. Bie, H. Cao, C. Liu, X. Liu, Y. Shi, M. Szostak, T. Zhou, *Org. Lett.*, 2021, 23, 20, 8098-8103.

S11

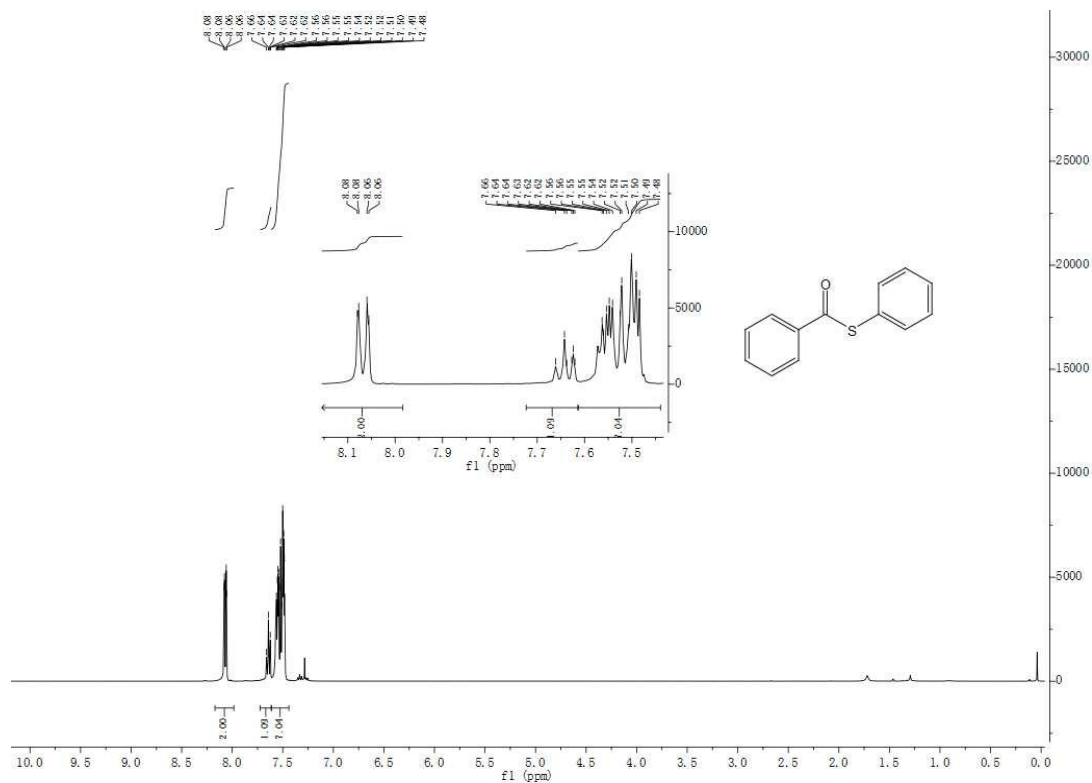

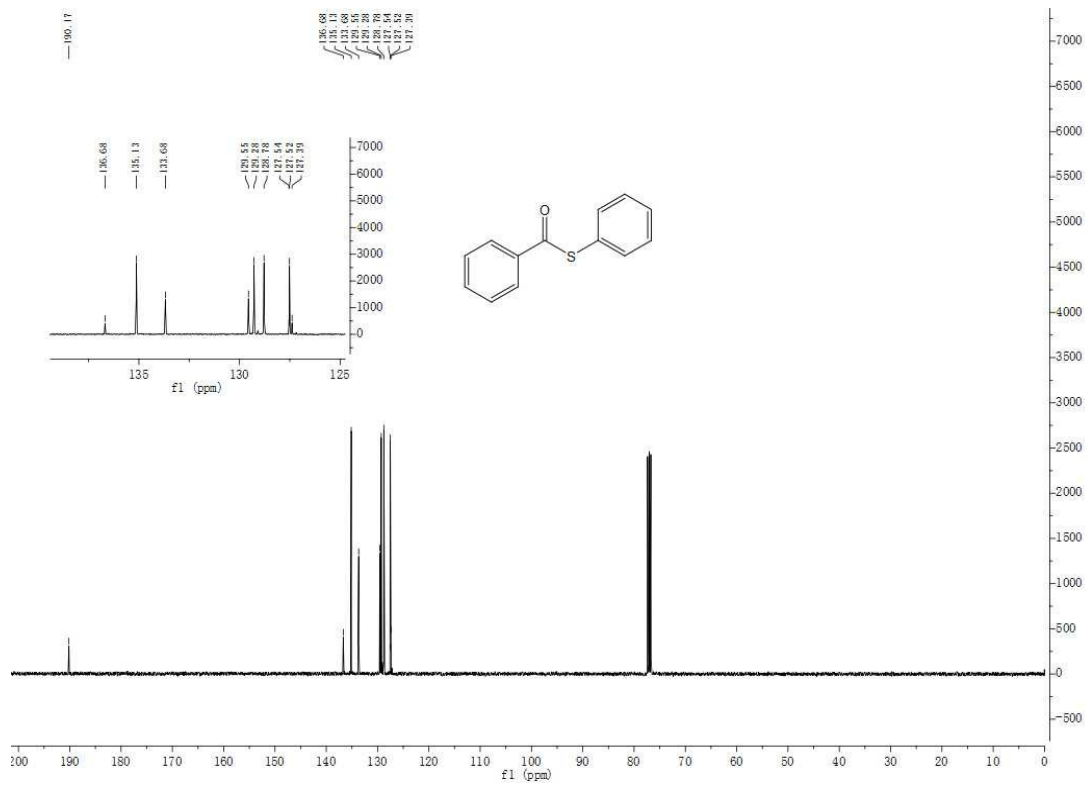

S12

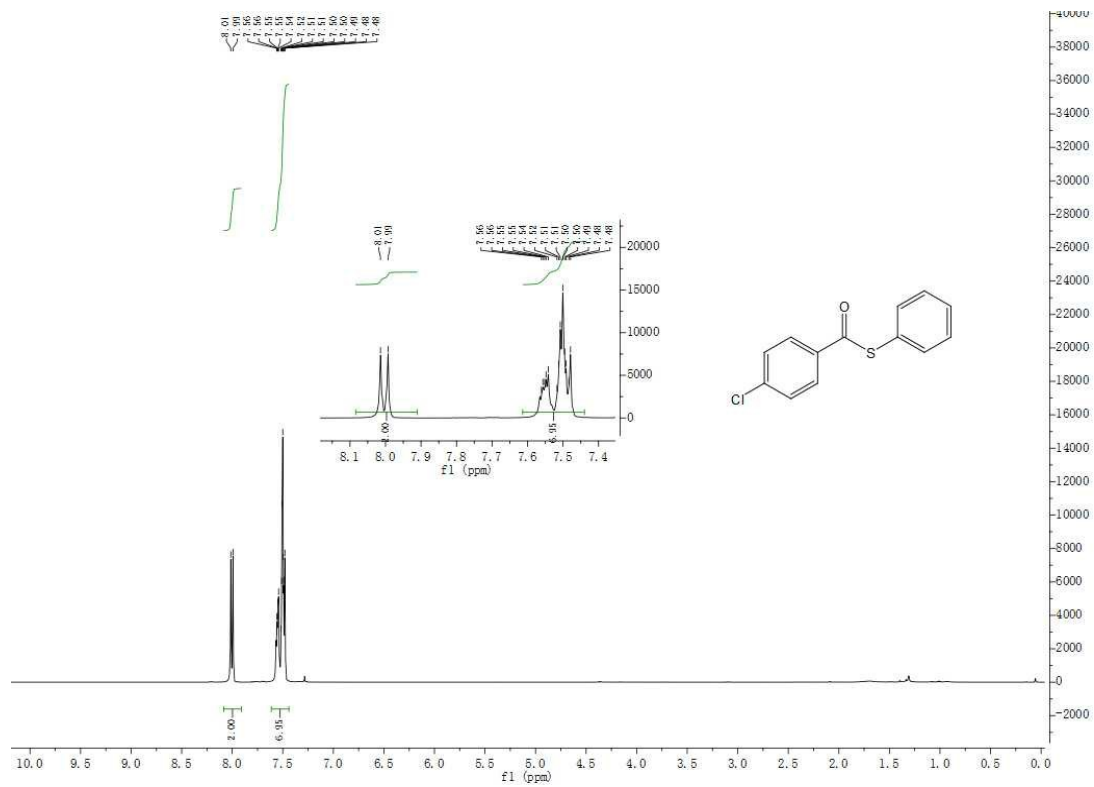

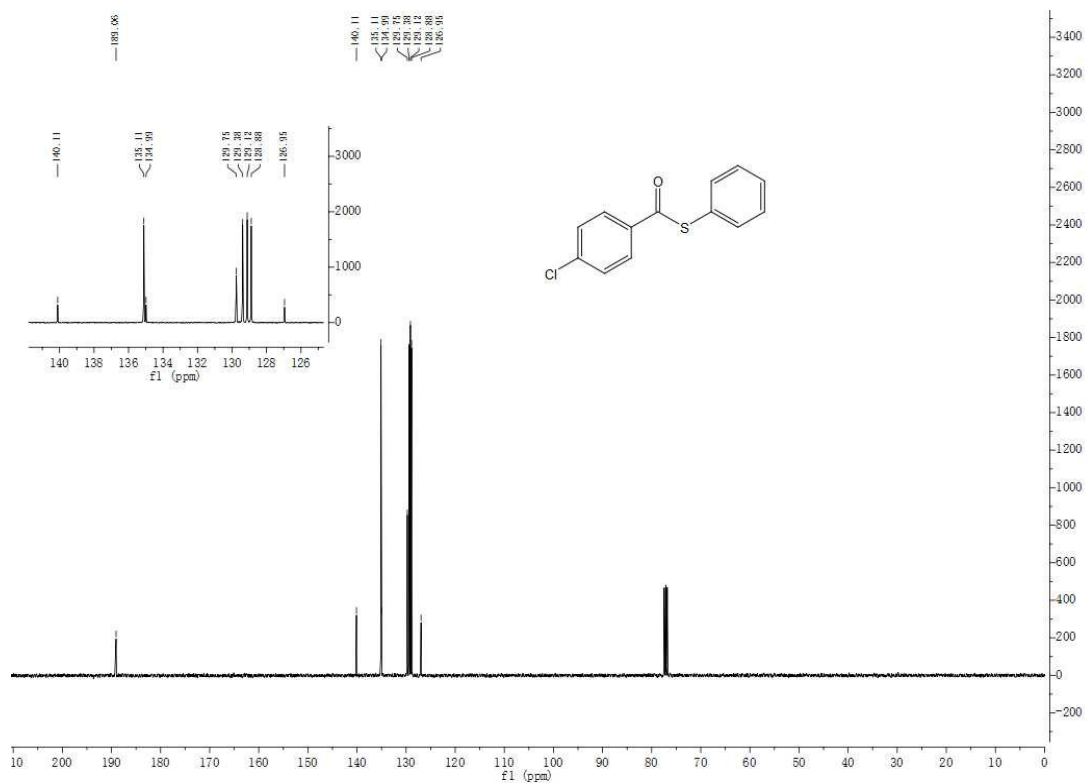

S13

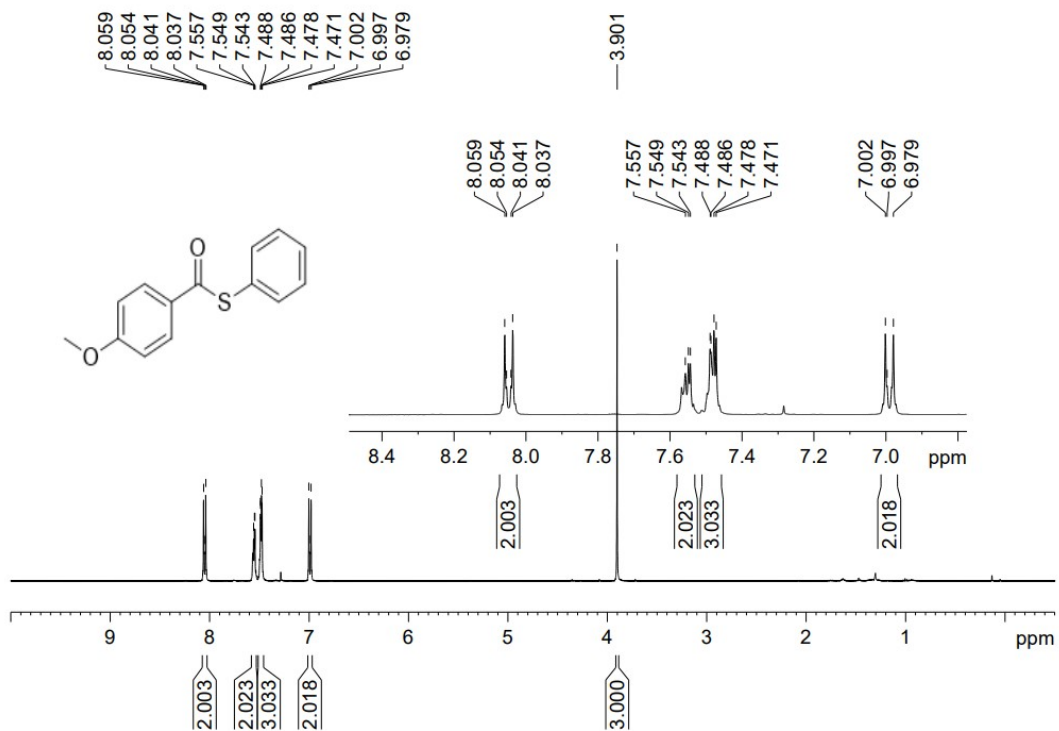





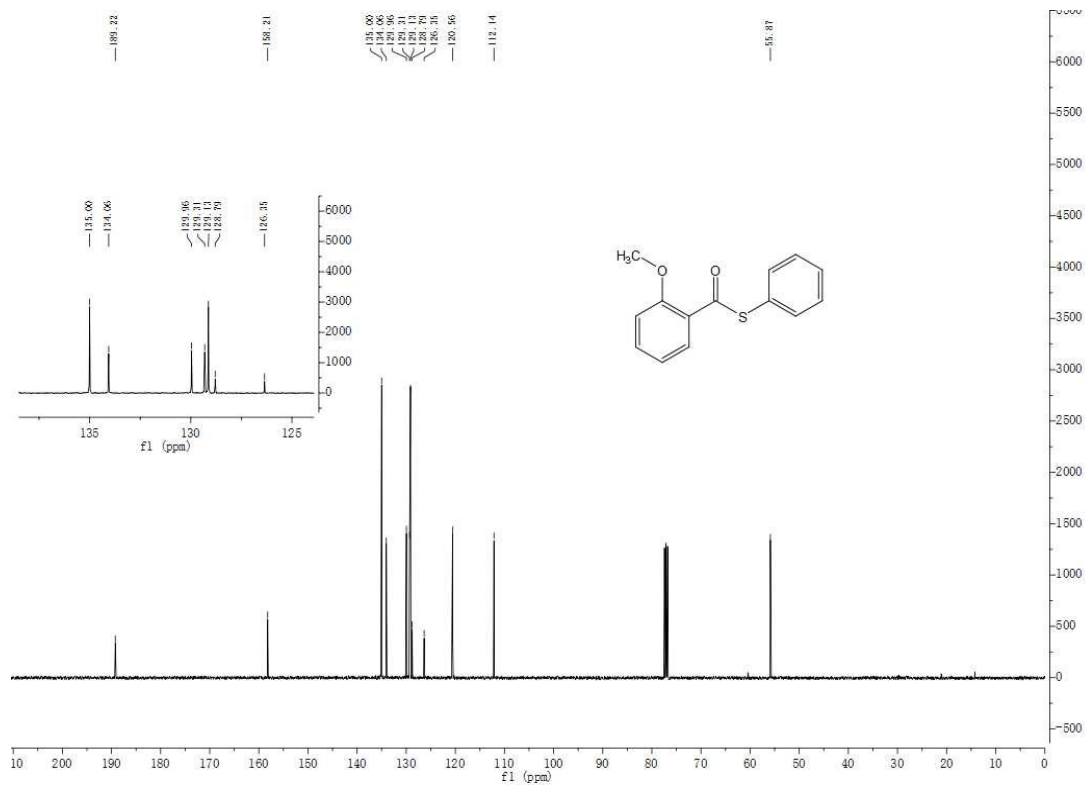

S15

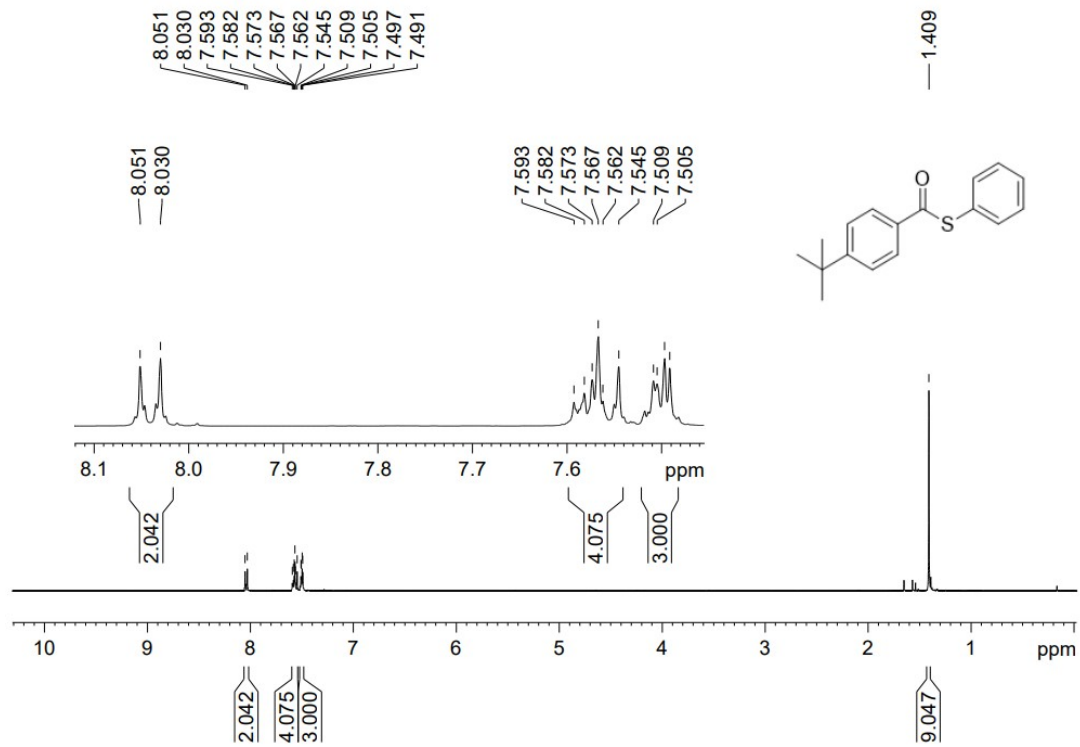

LJQ-040601  
13C NMR  
CDCl3

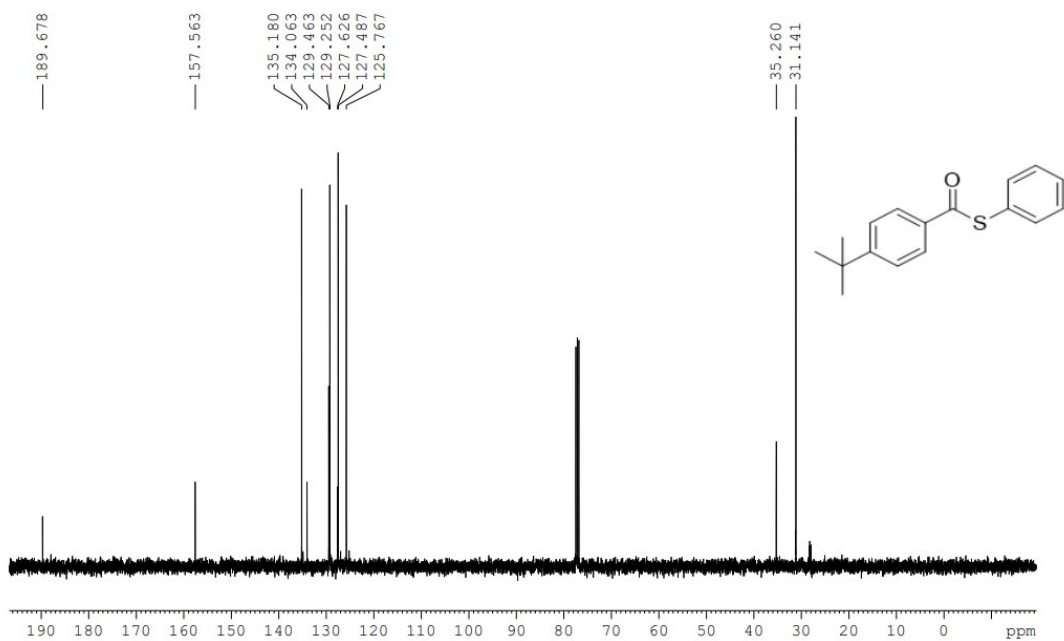

S16

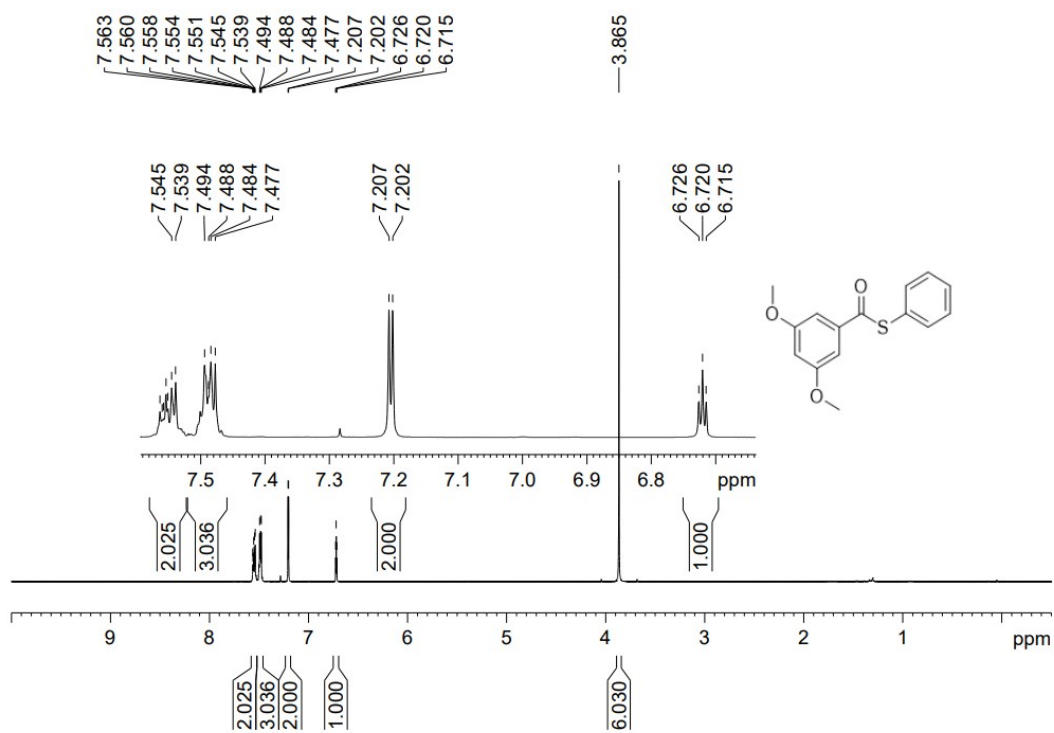

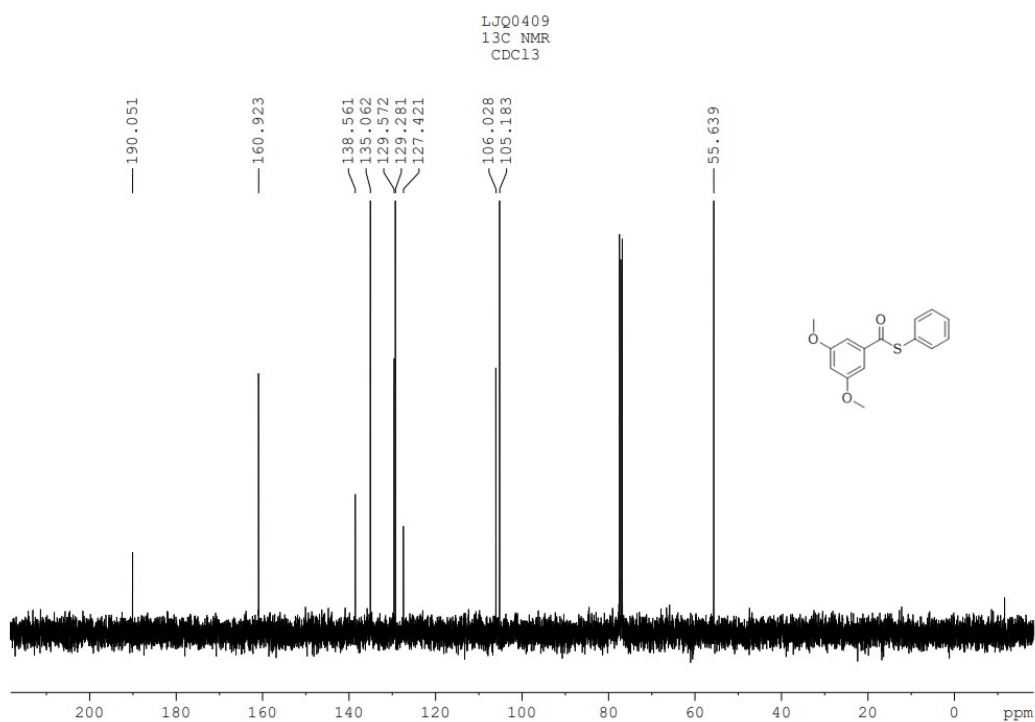

S17

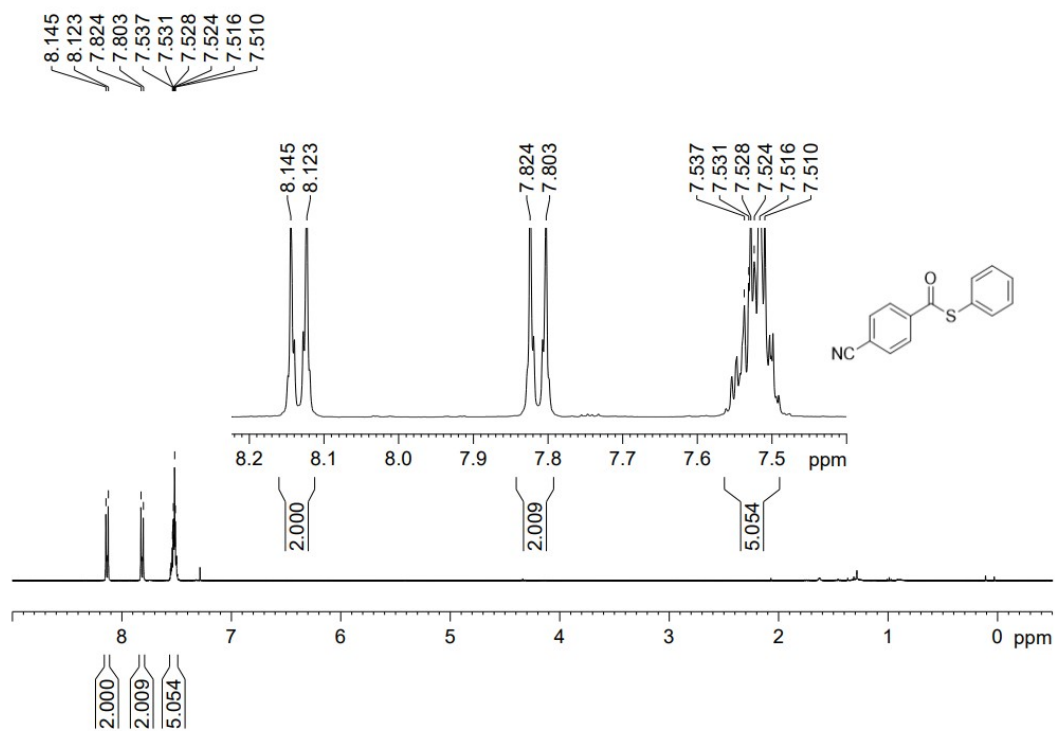

LJQ-041701  
13C NMR  
CDCl3

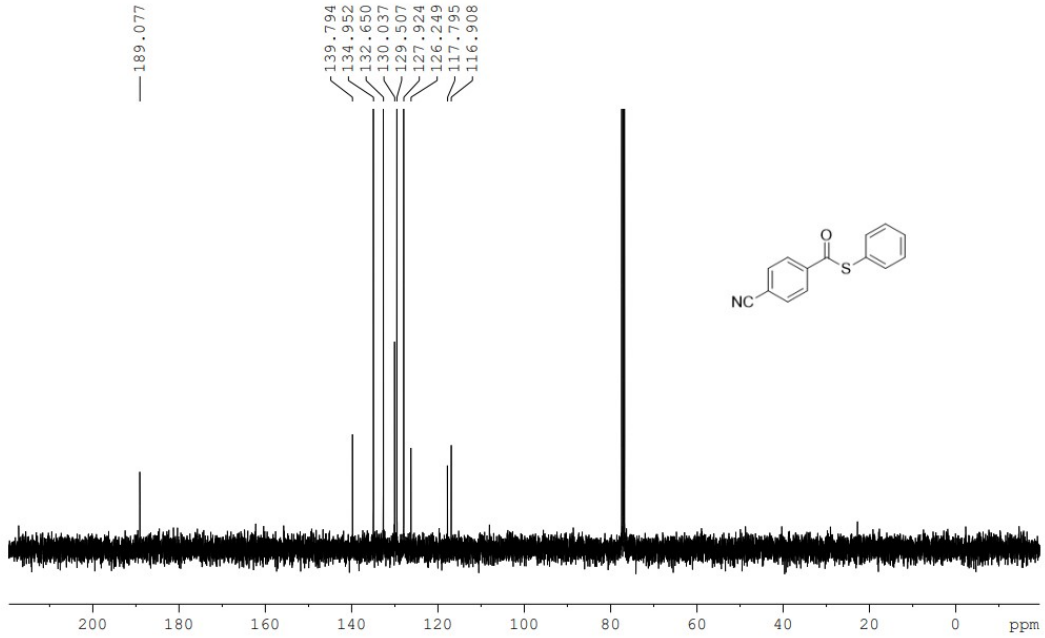

S18

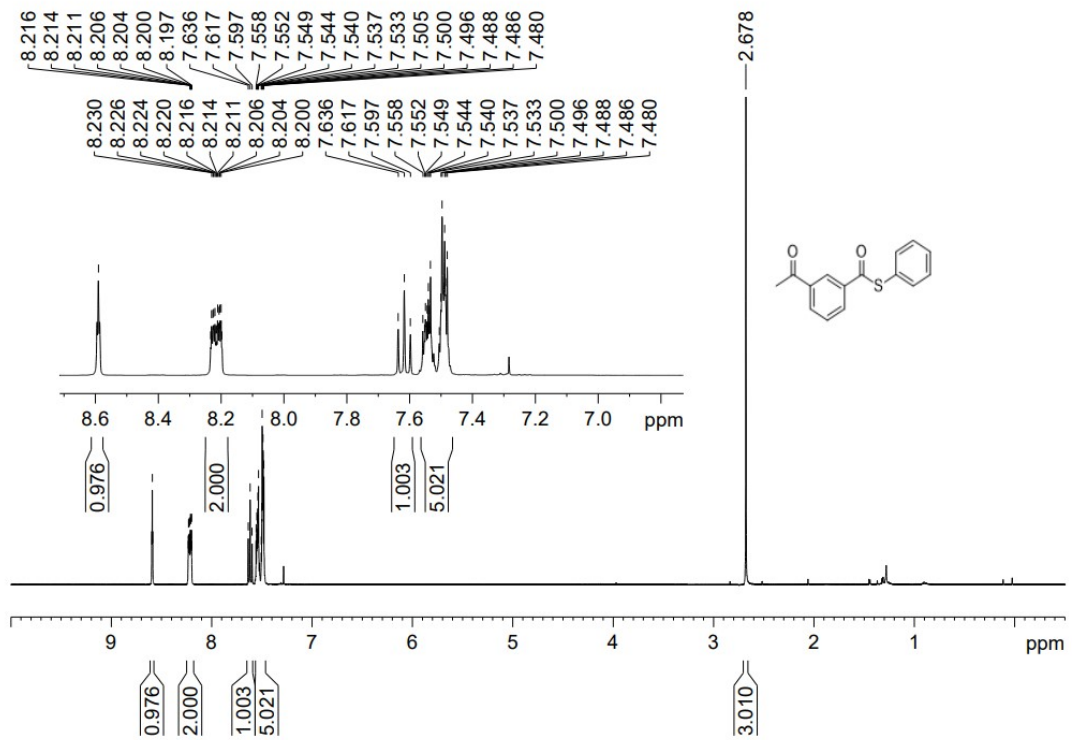

LJQ040801  
13C NMR  
CDCl3

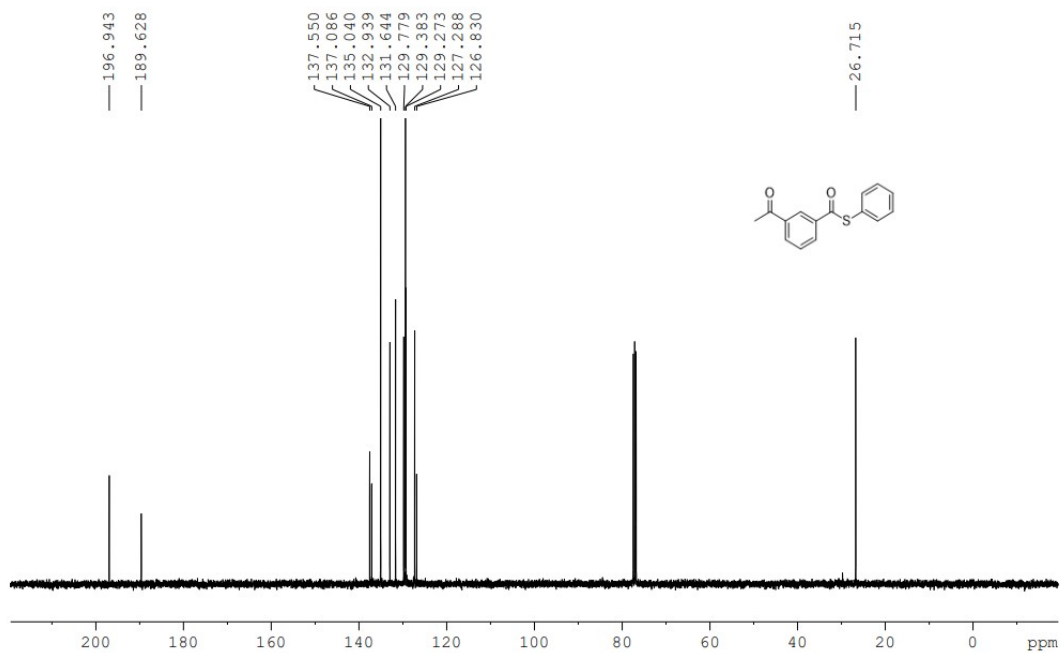

S19

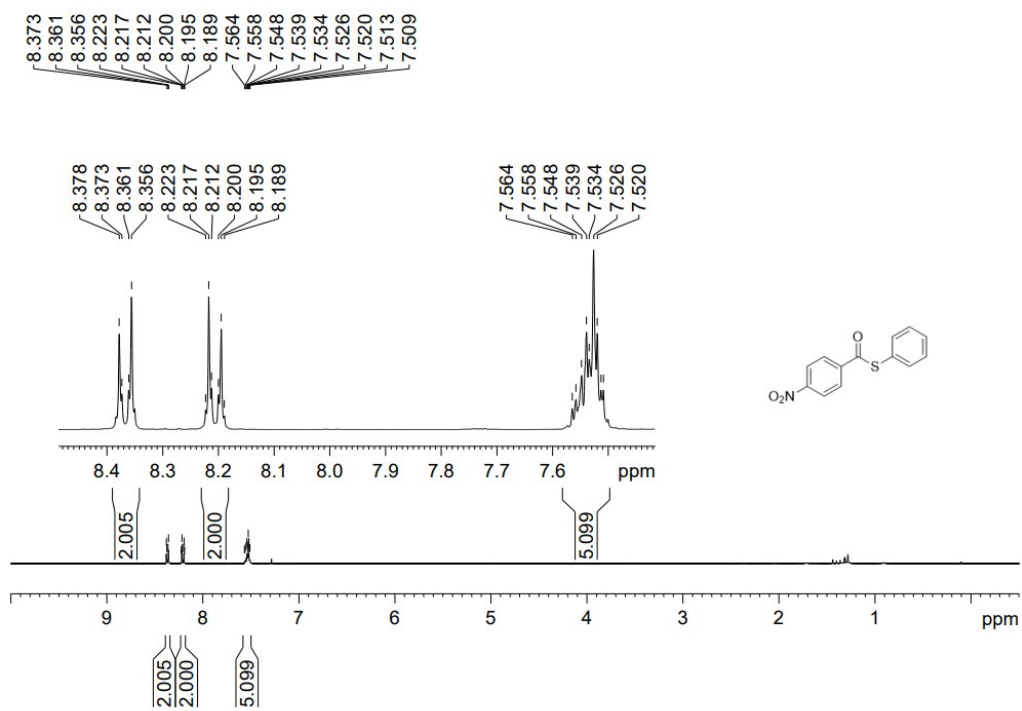

LJQ-032702  
13C NMR  
CDCl3

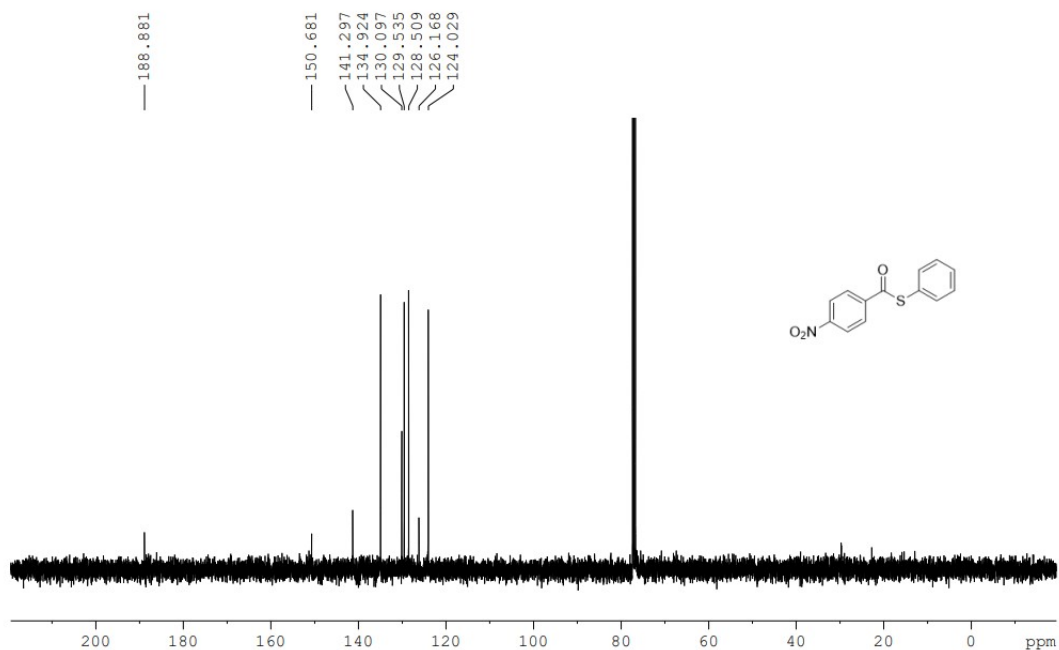

S20

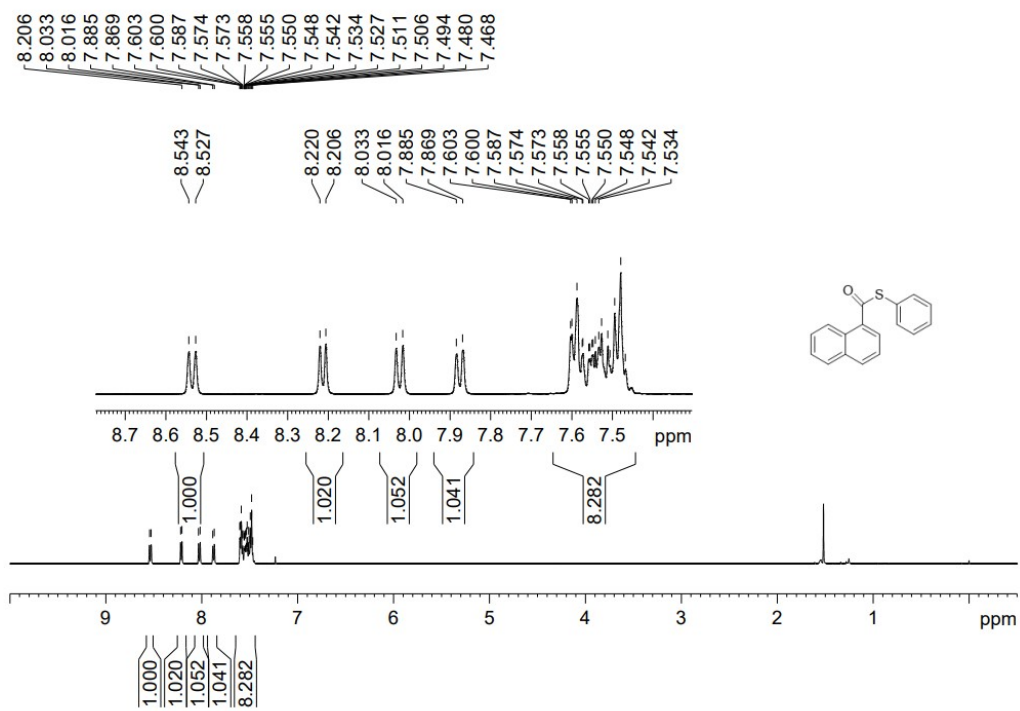

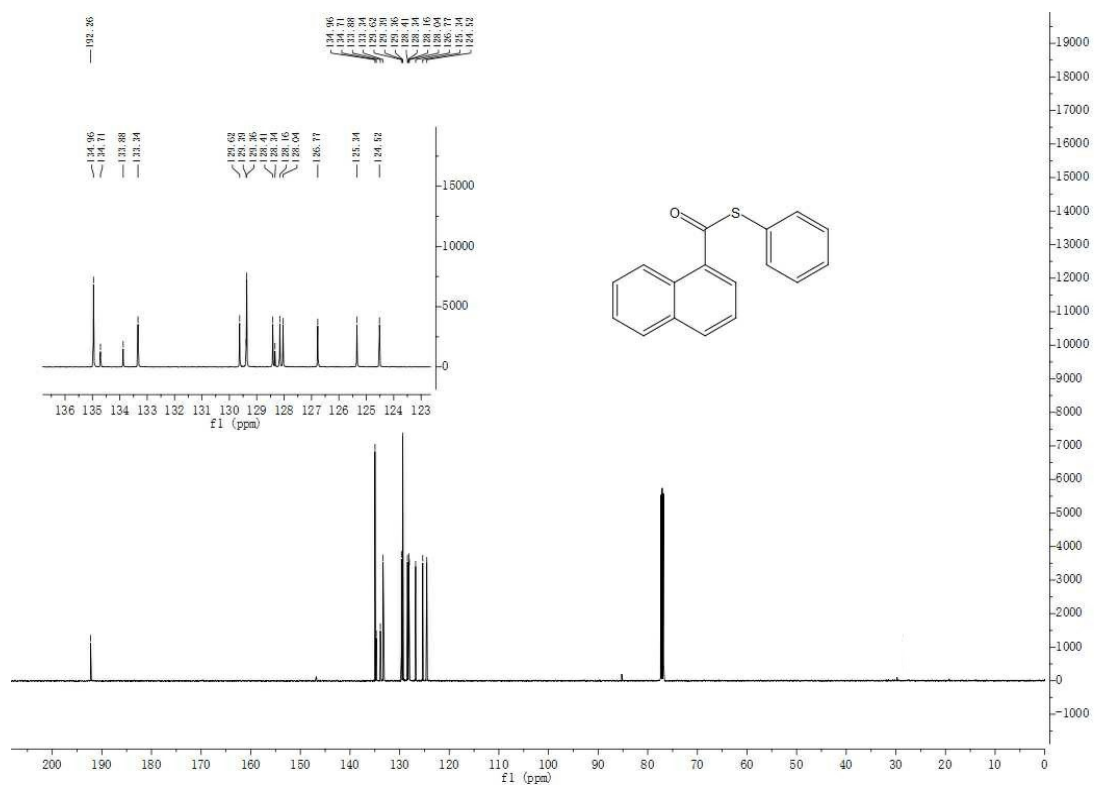

S21

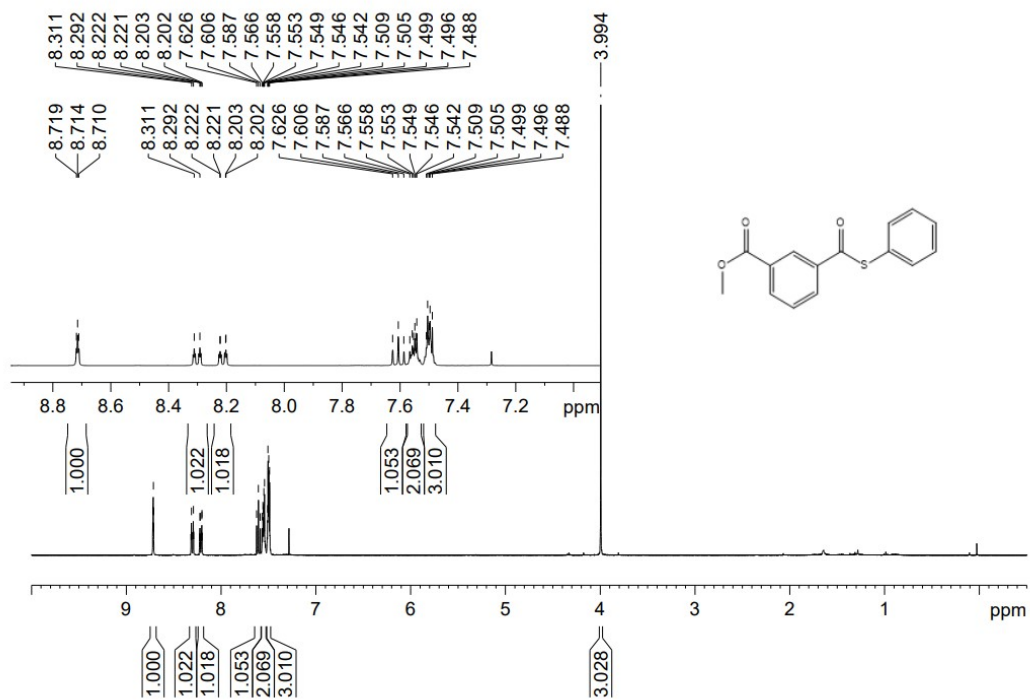



LJQ041102  
13C NMR  
CDCl3

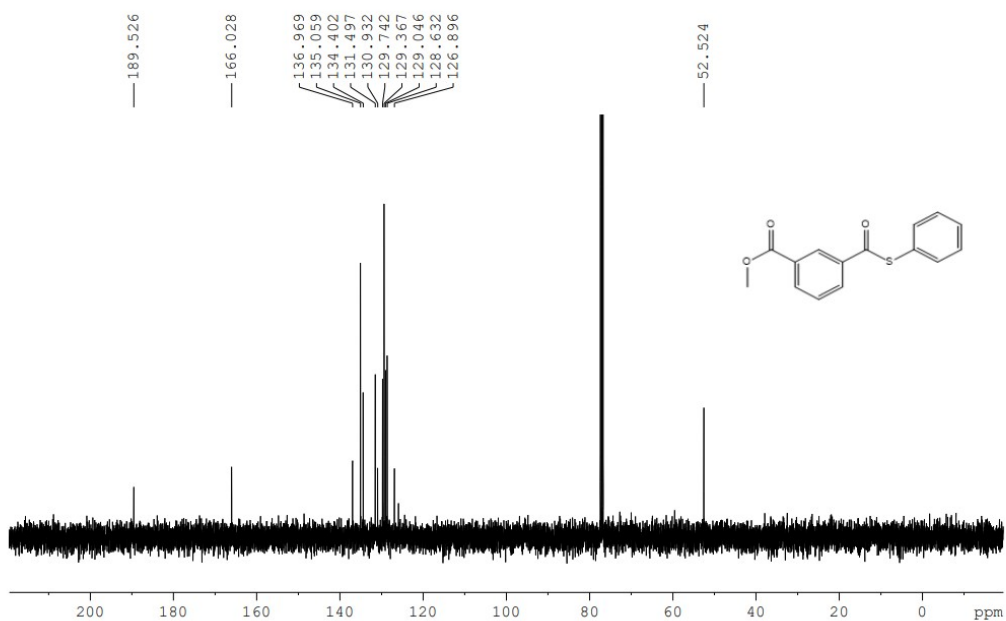



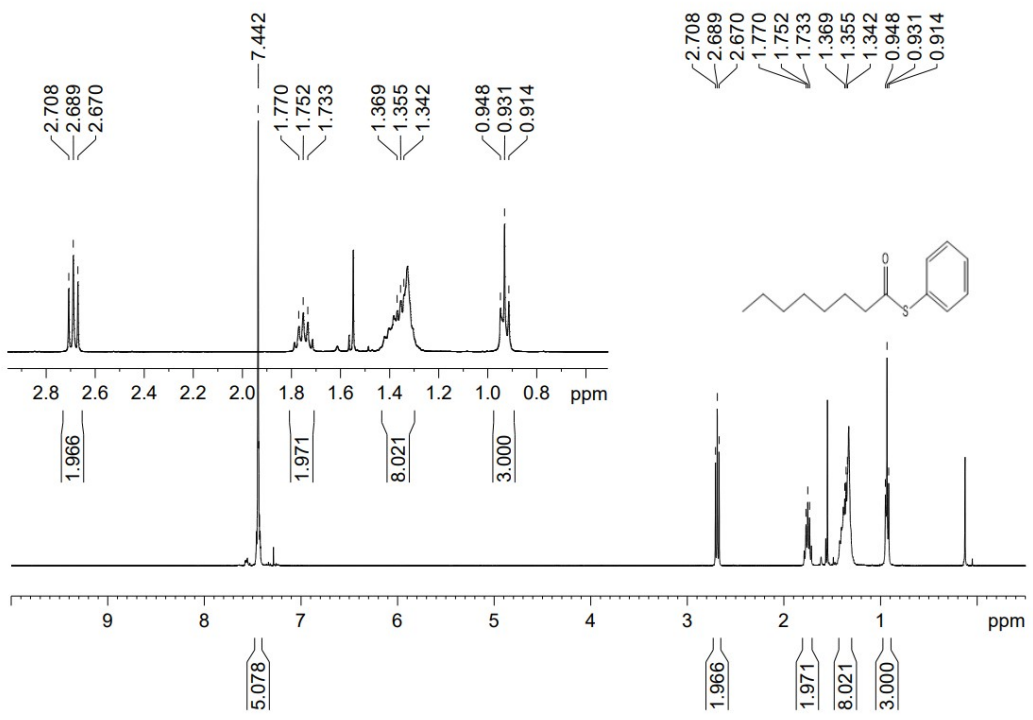

LJQ041302  
<sup>13</sup>C NMR  
 CDC13

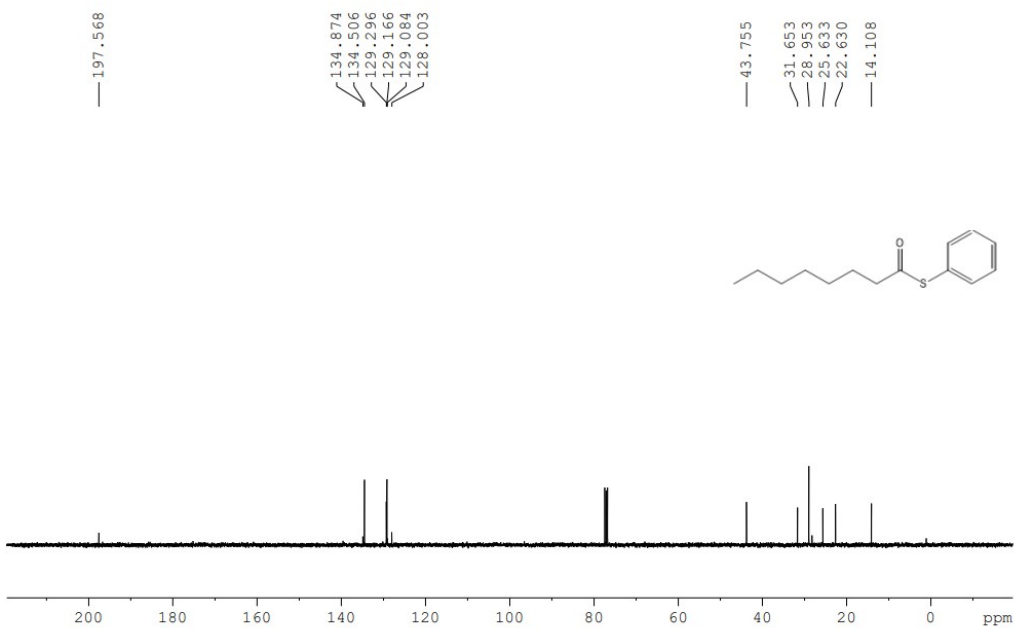

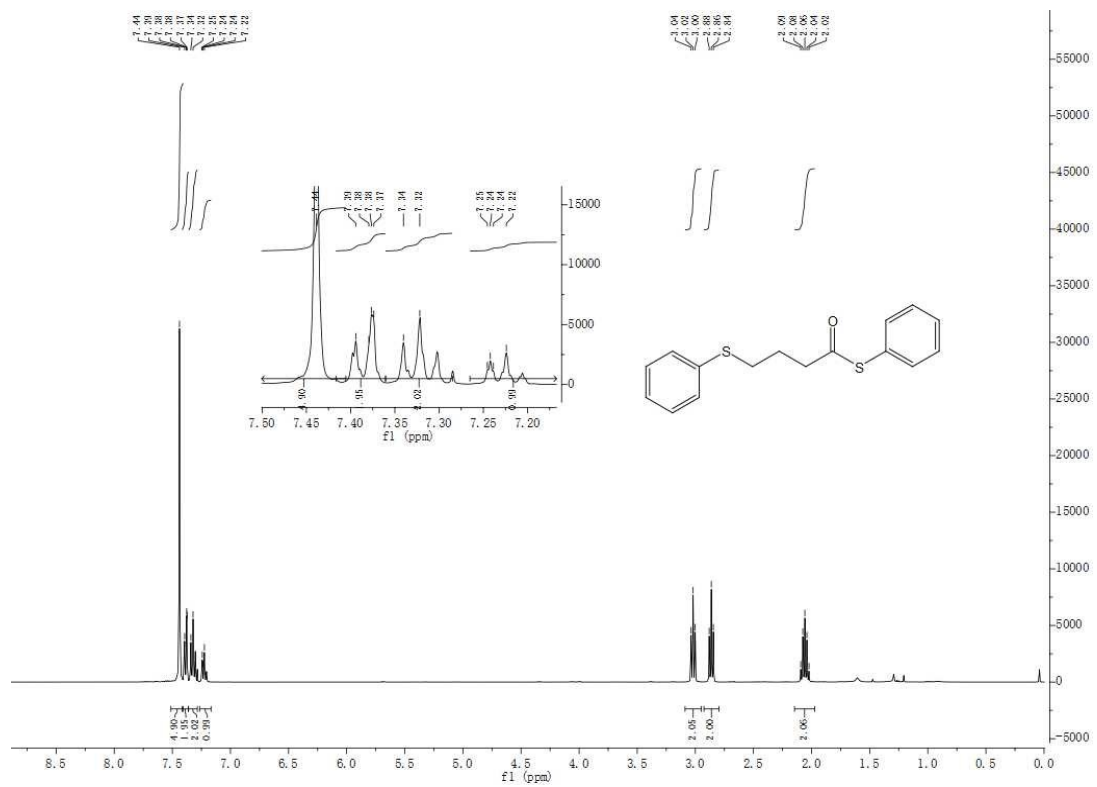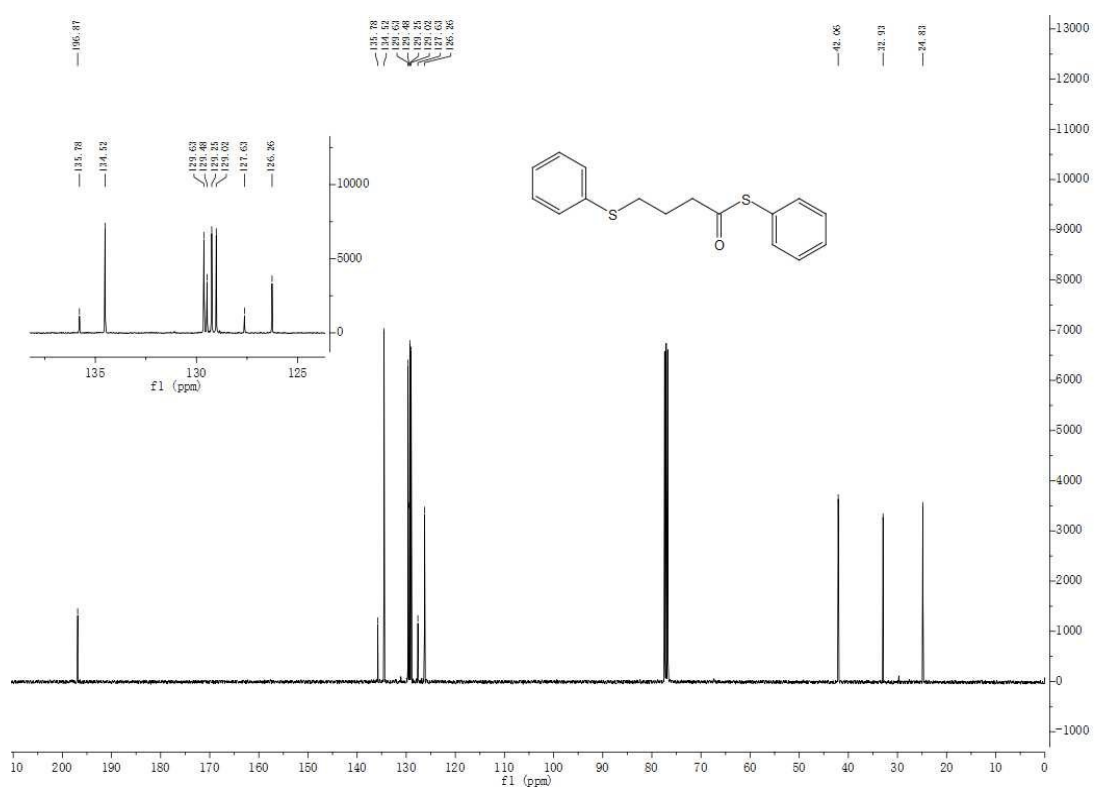

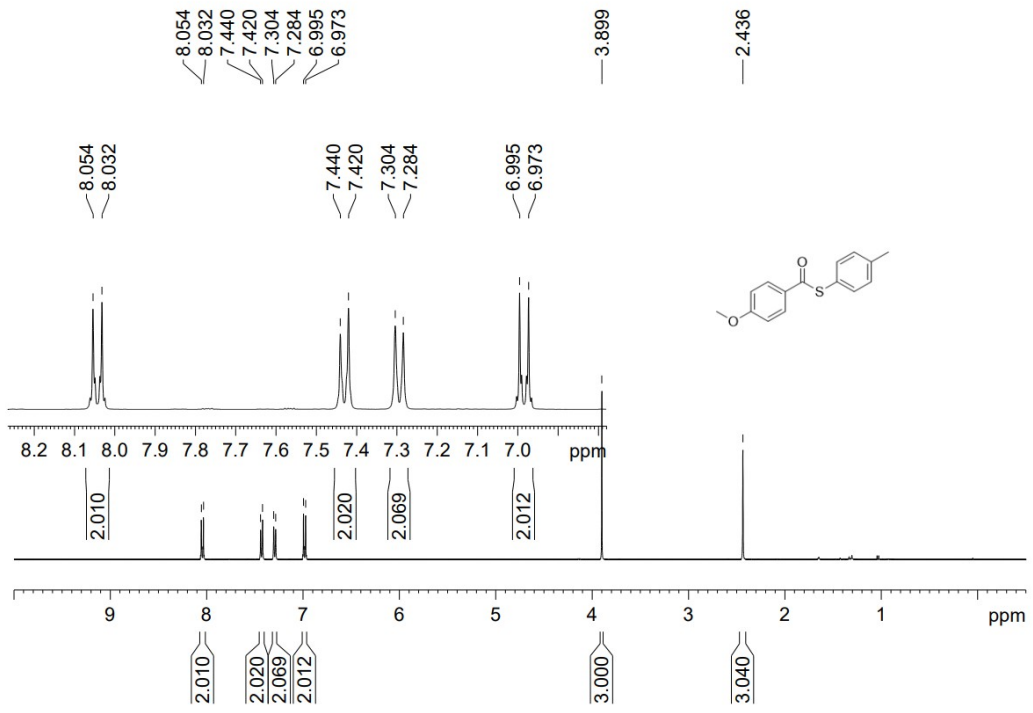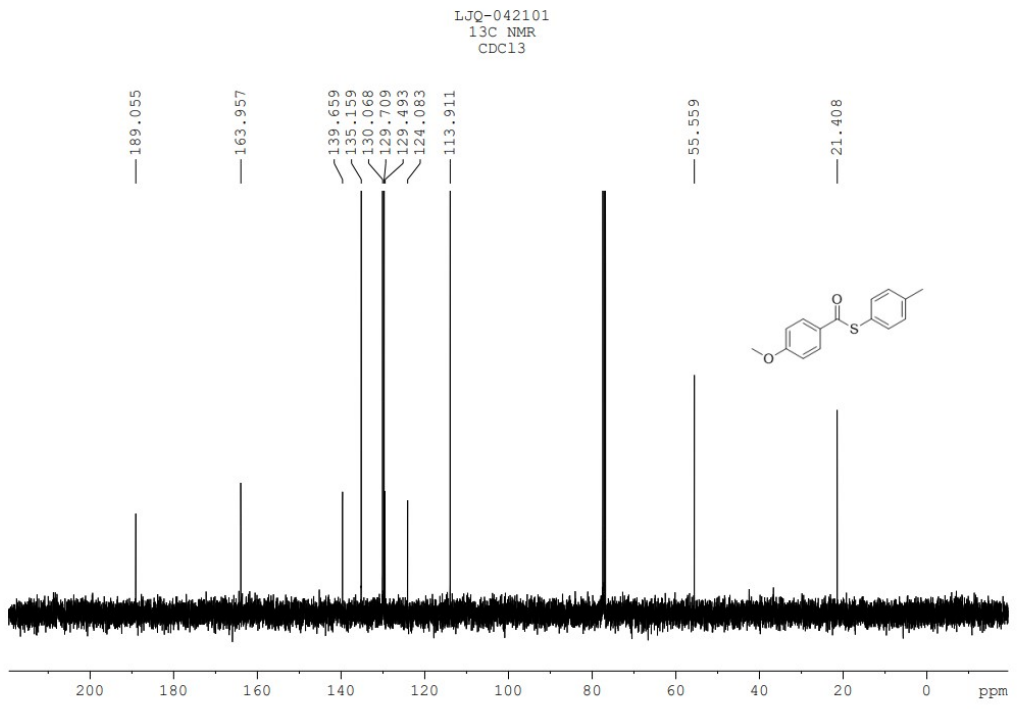

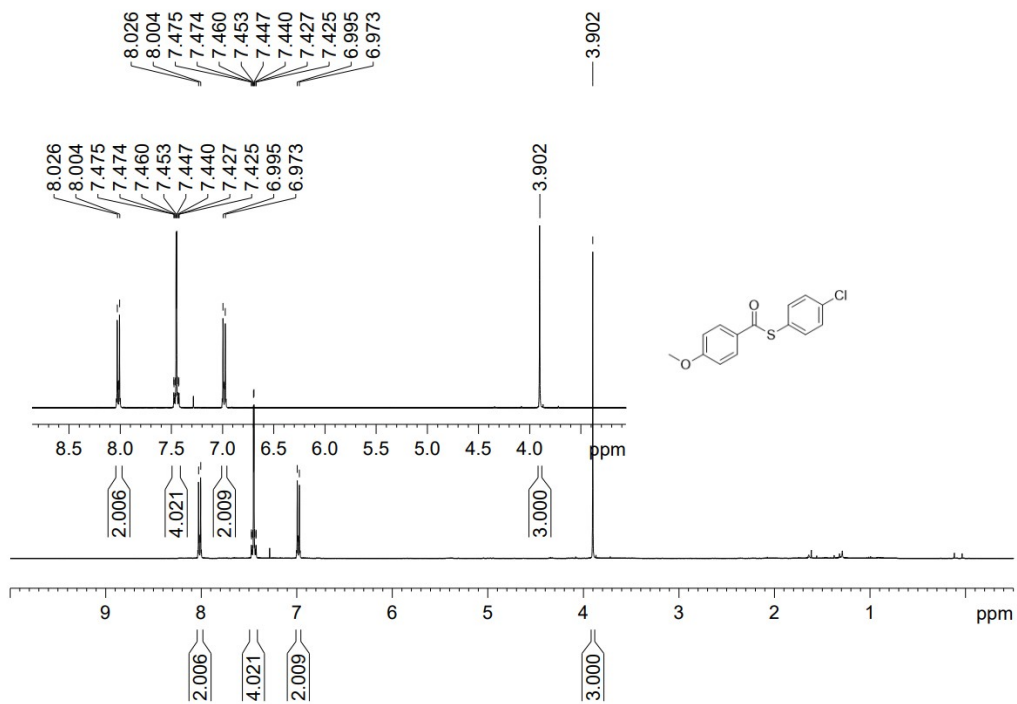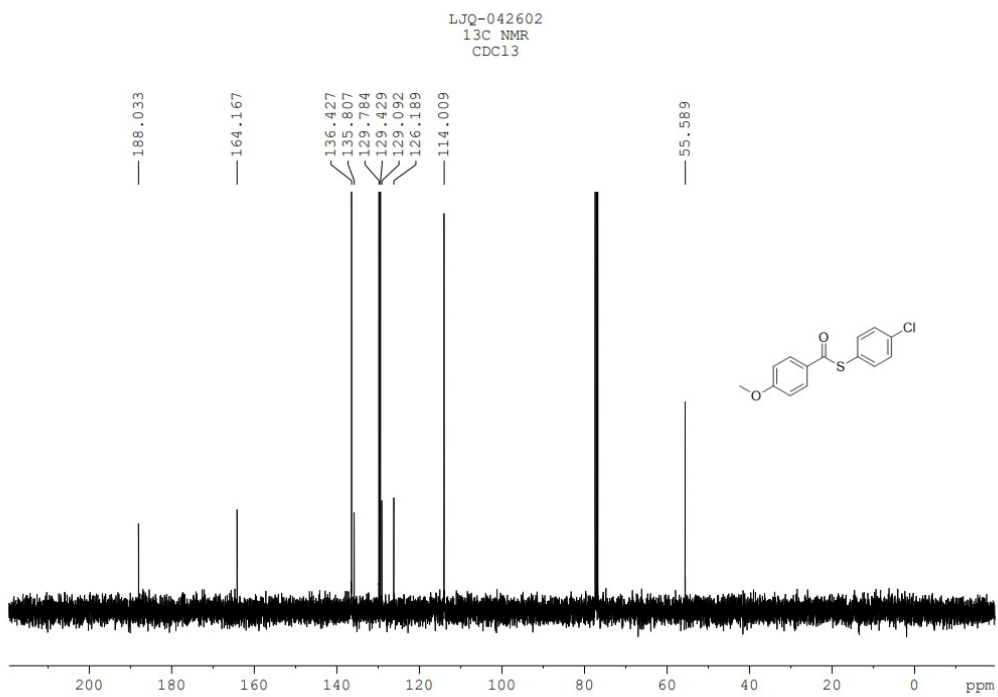

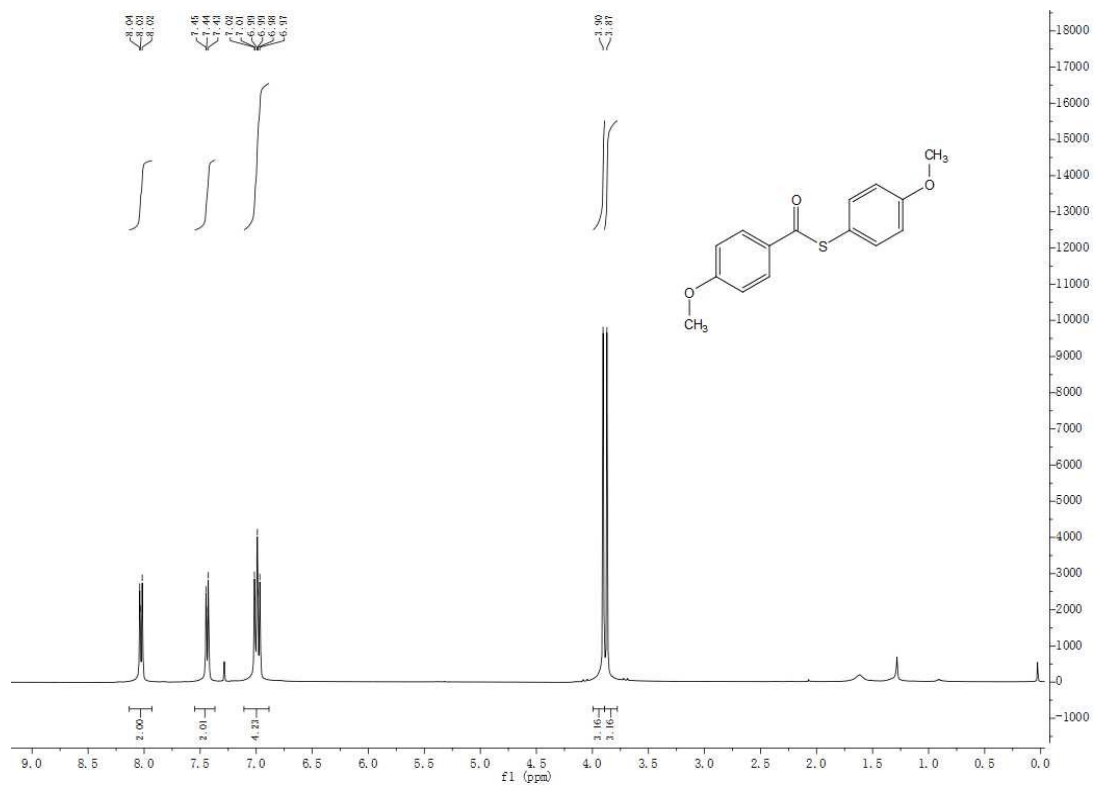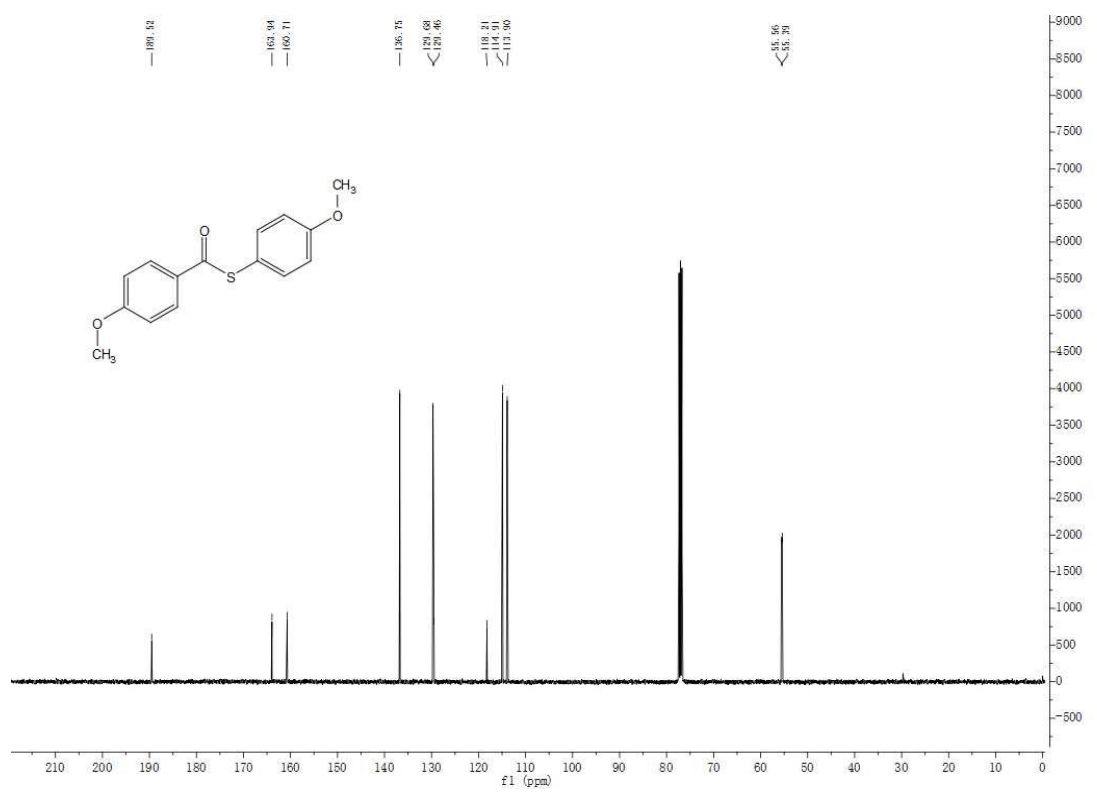

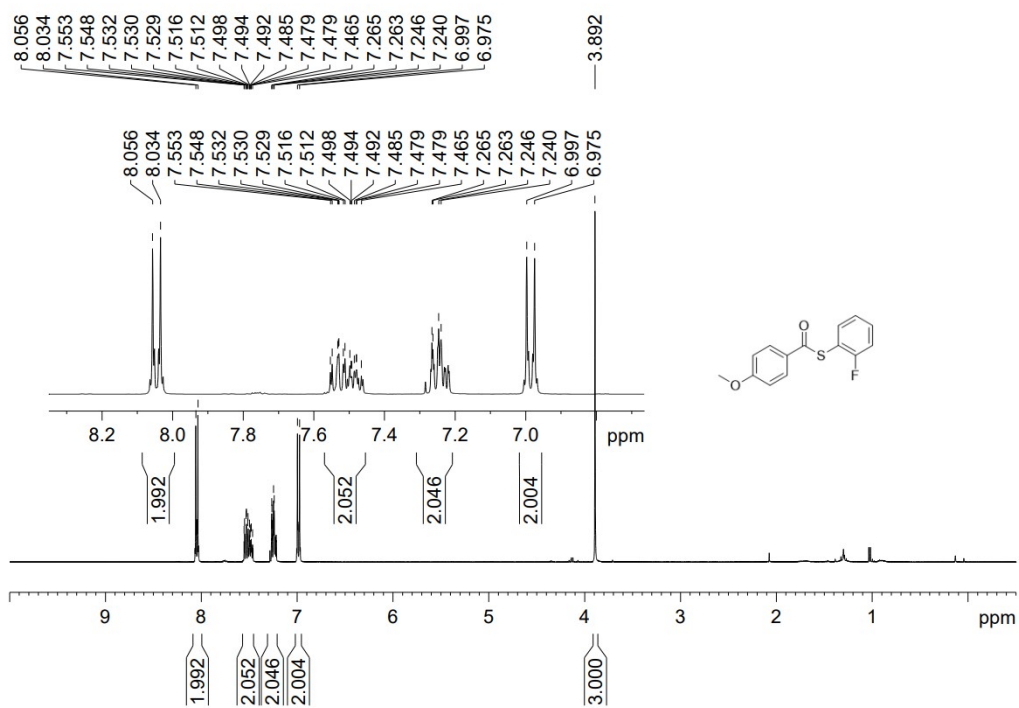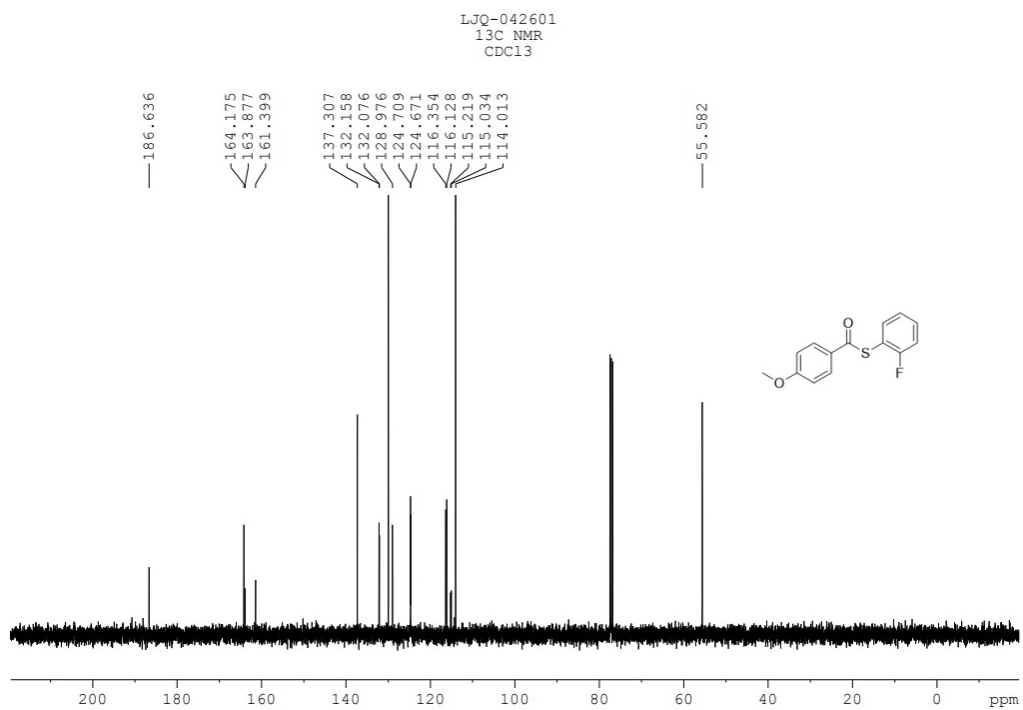



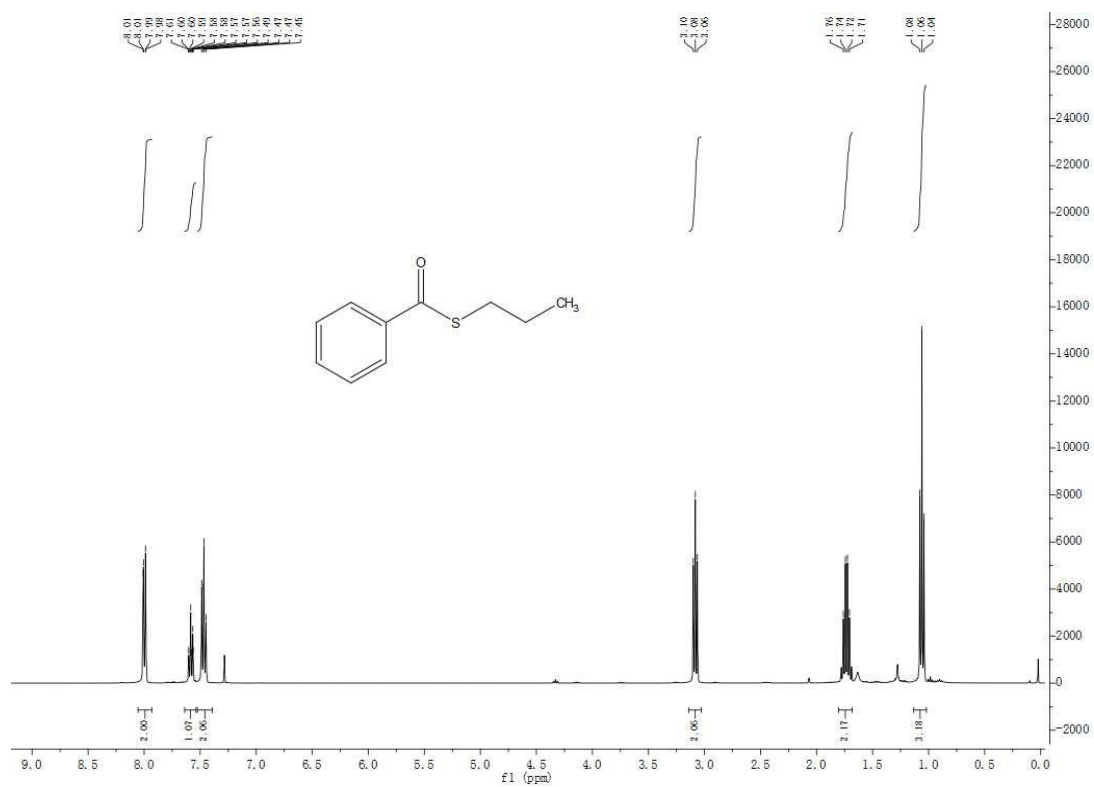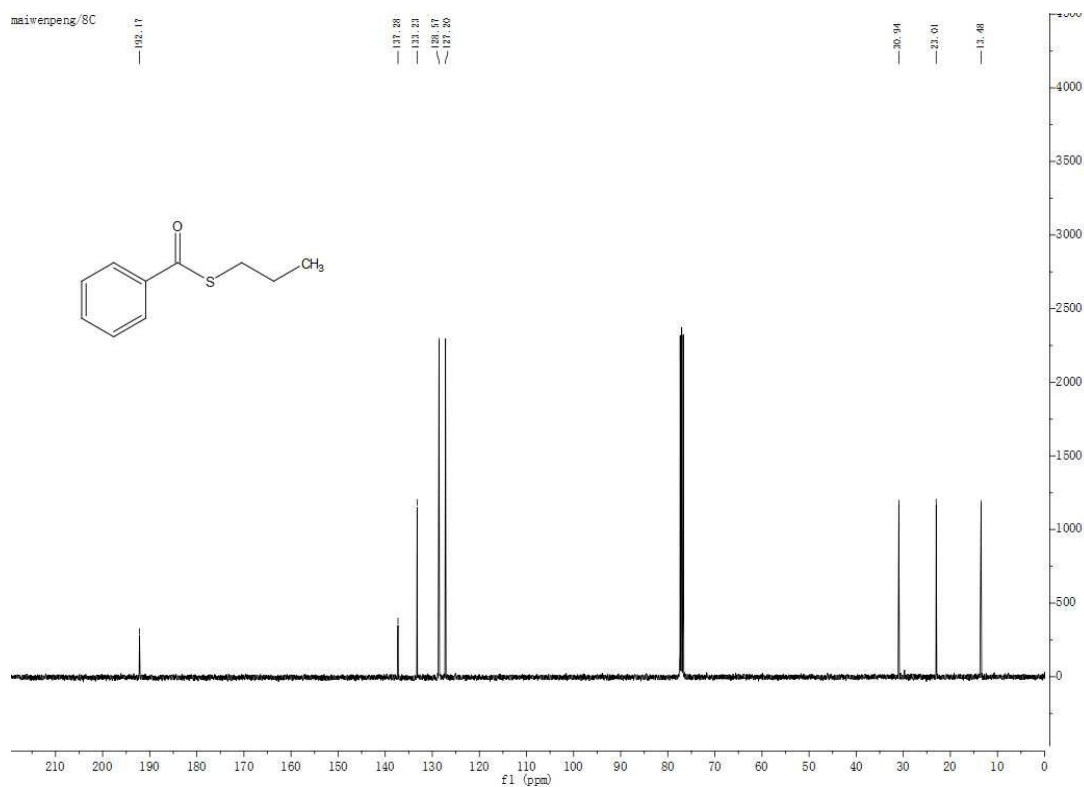

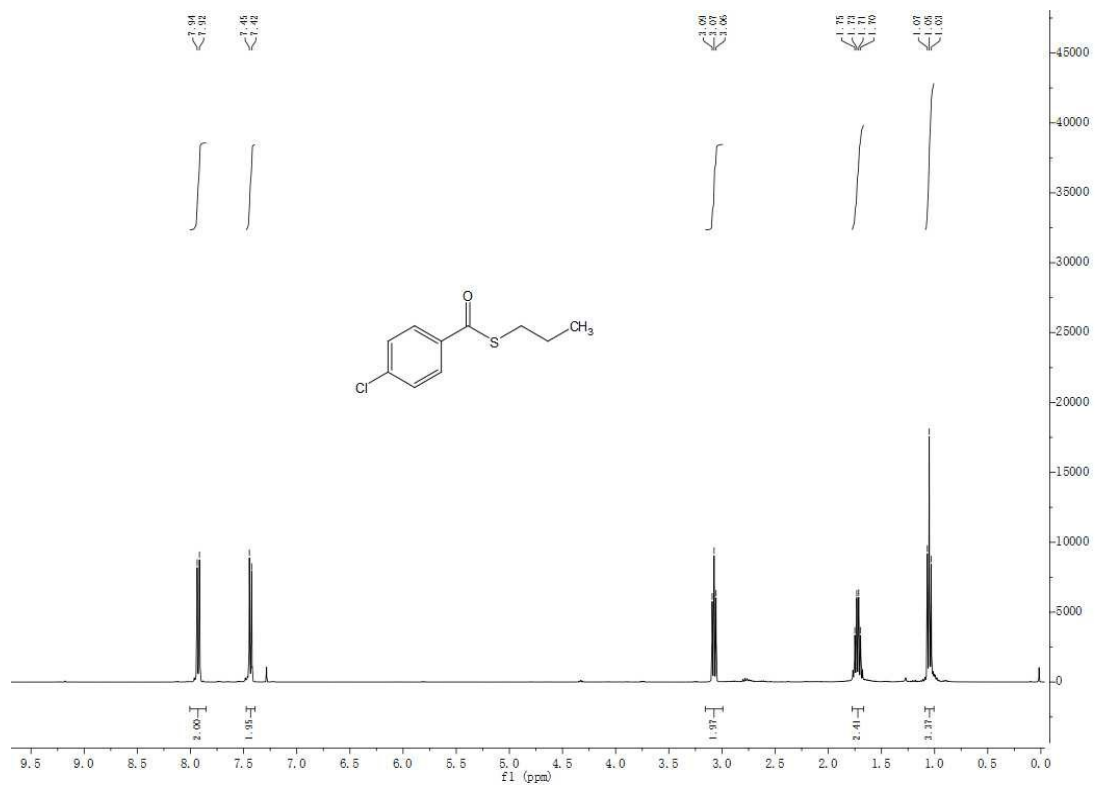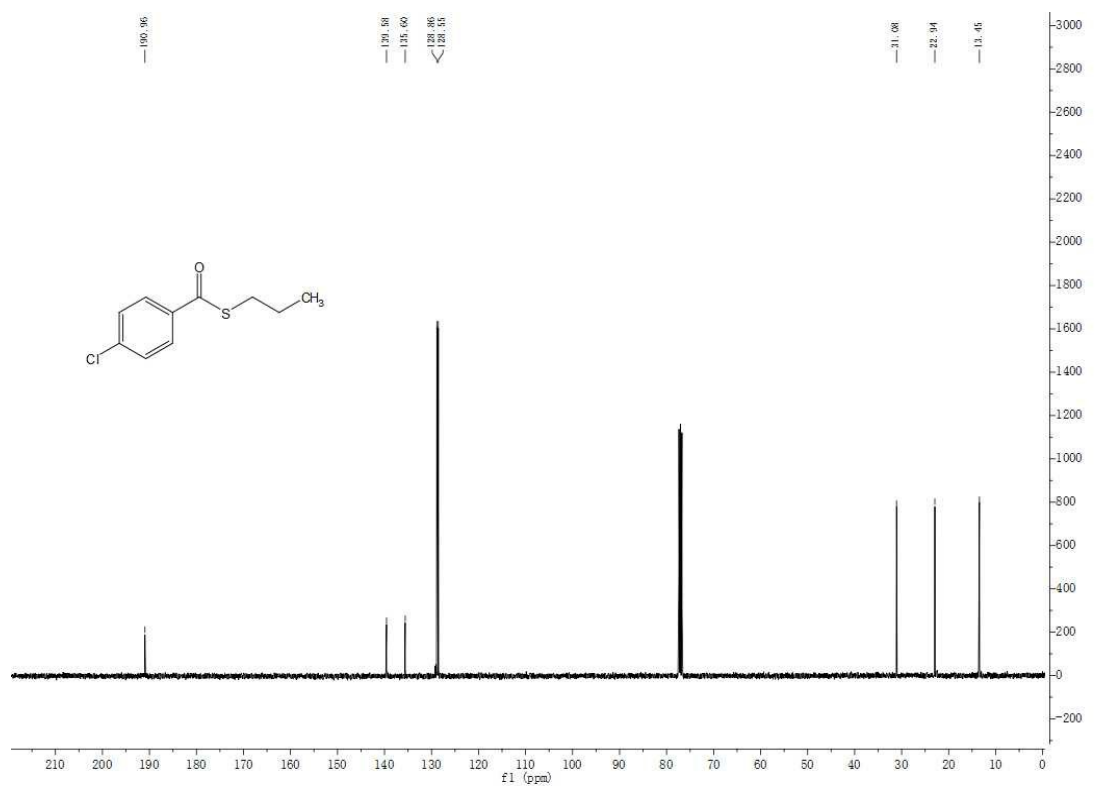

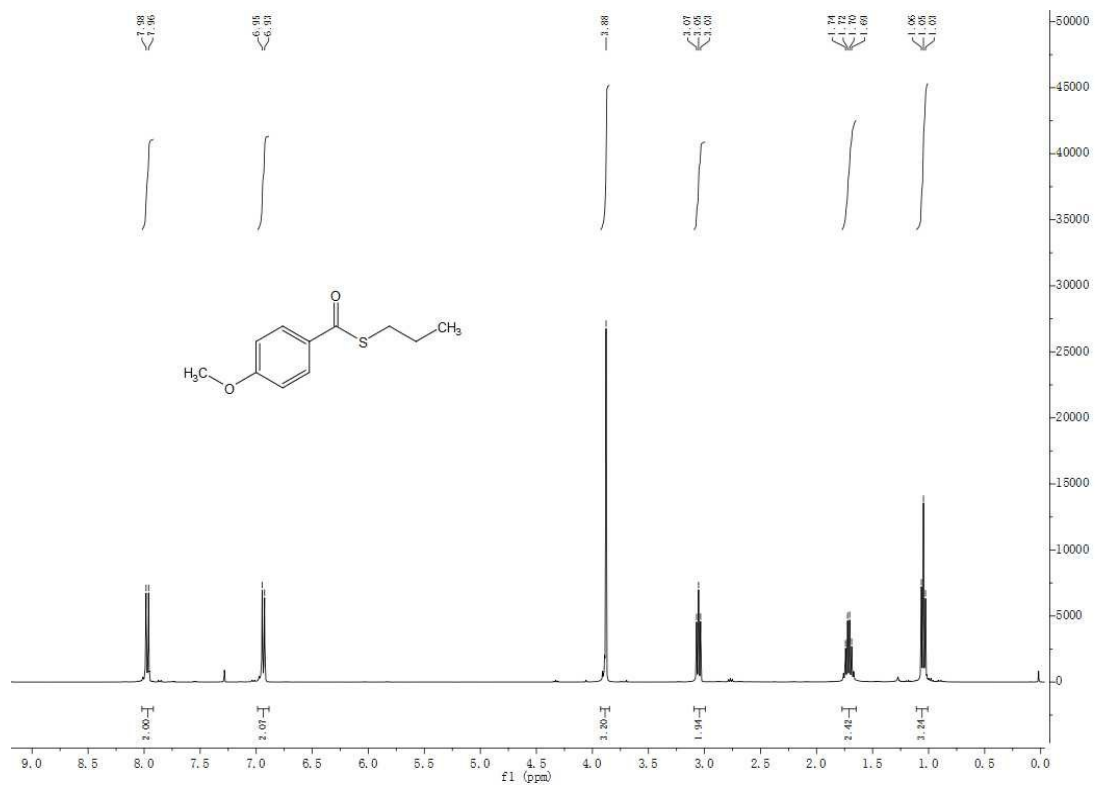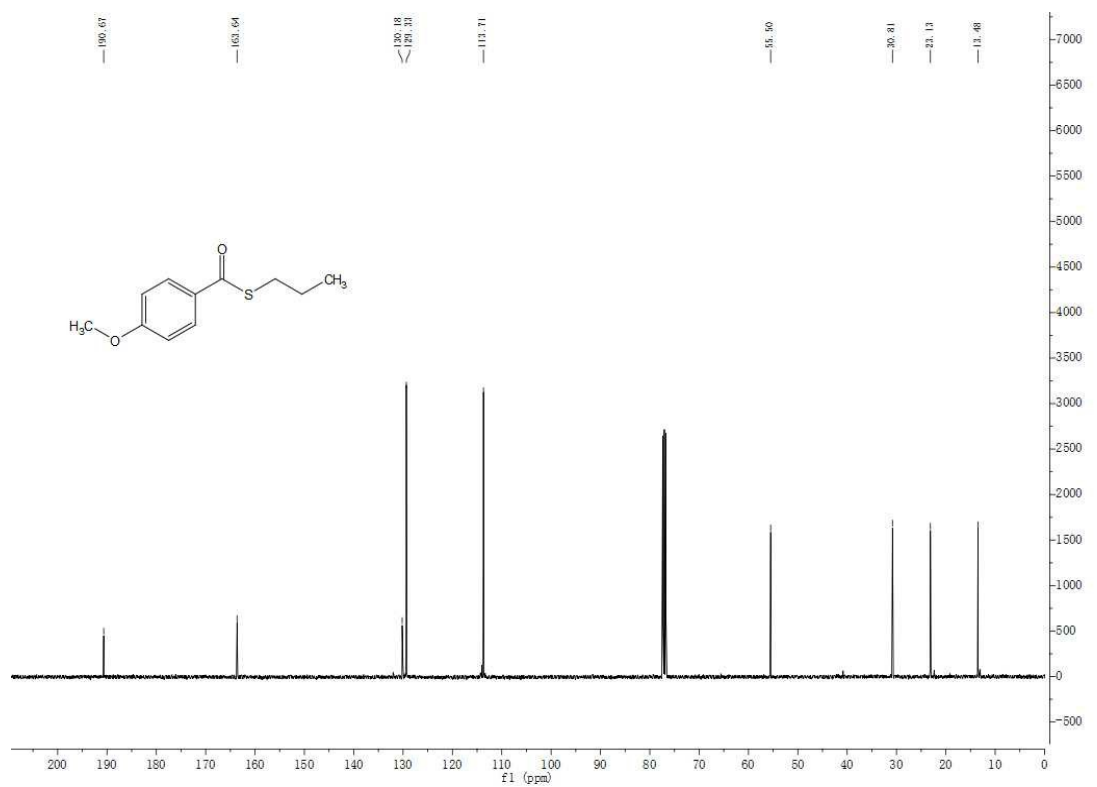

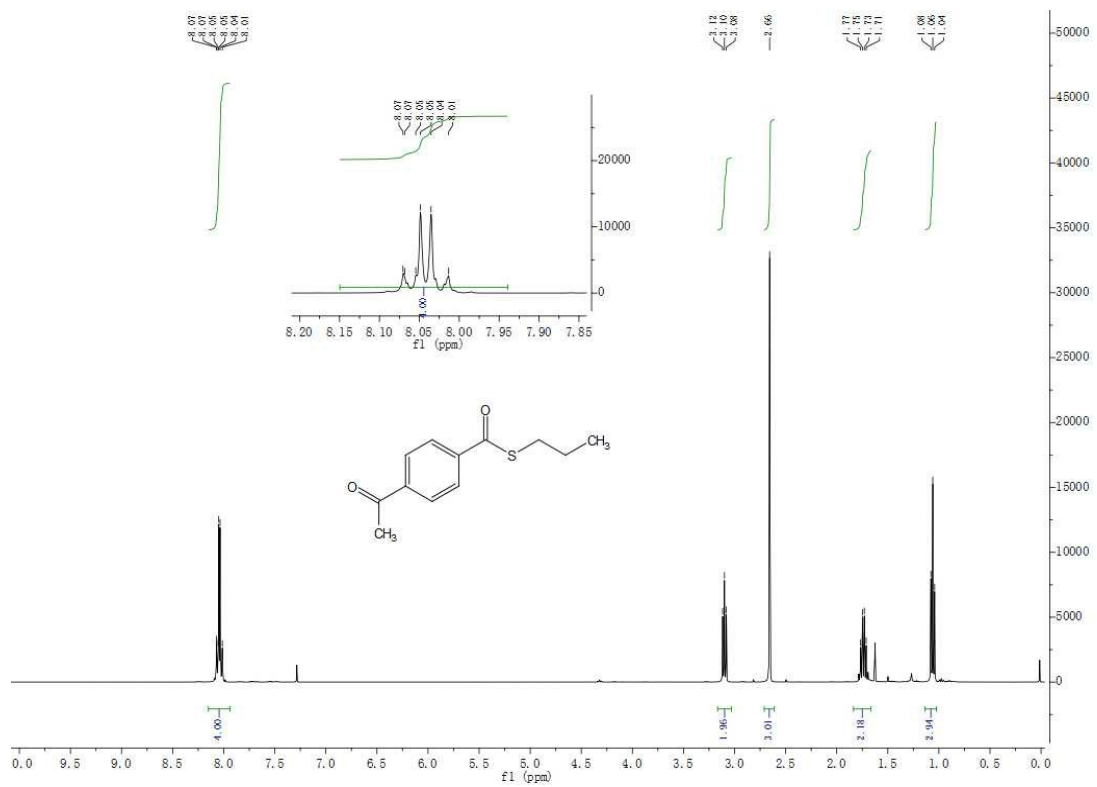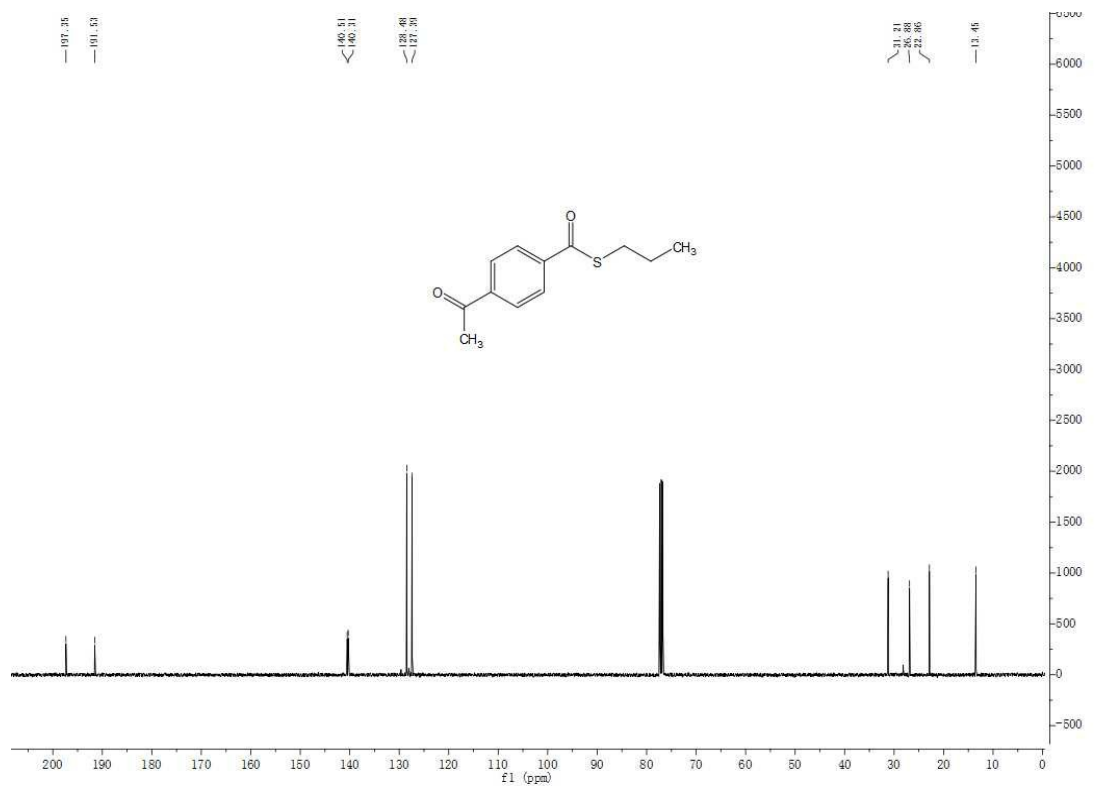

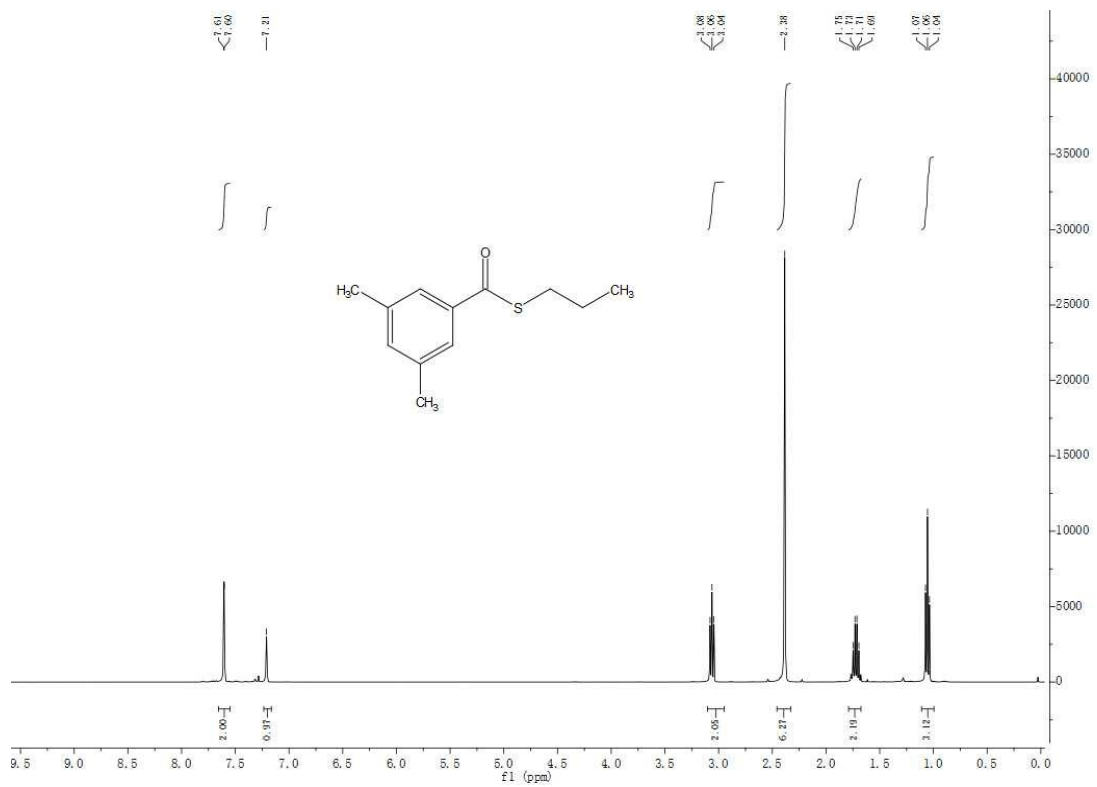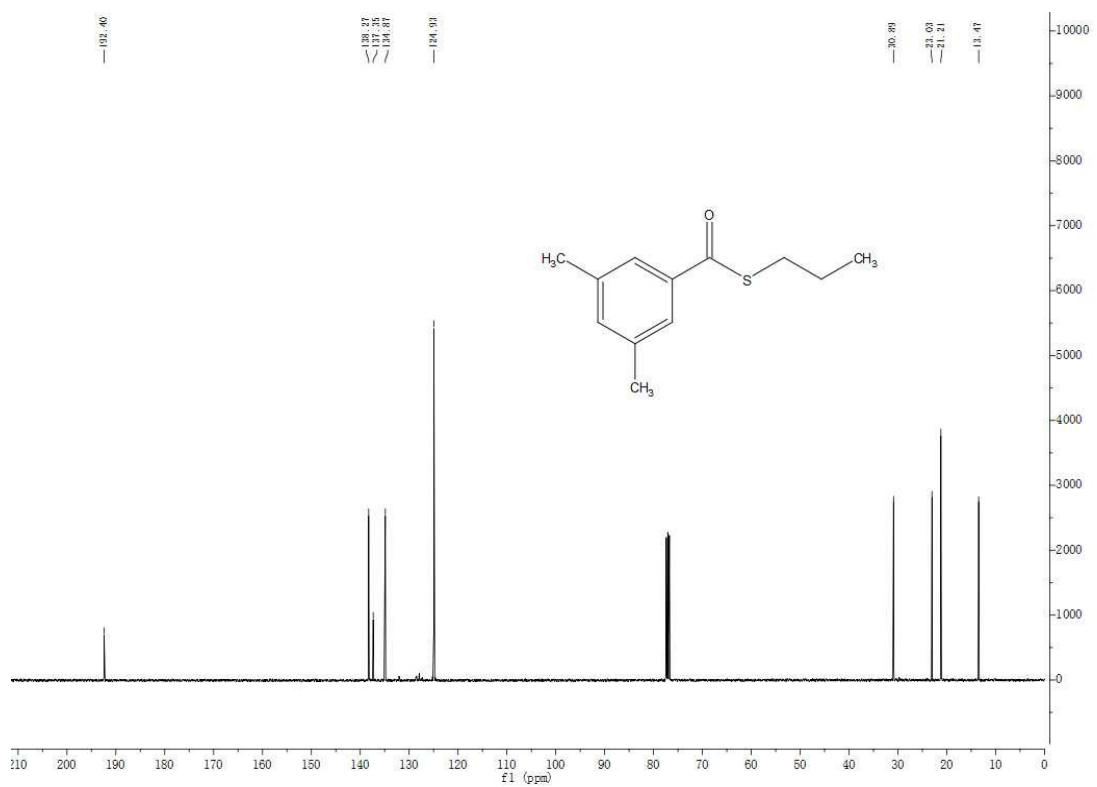

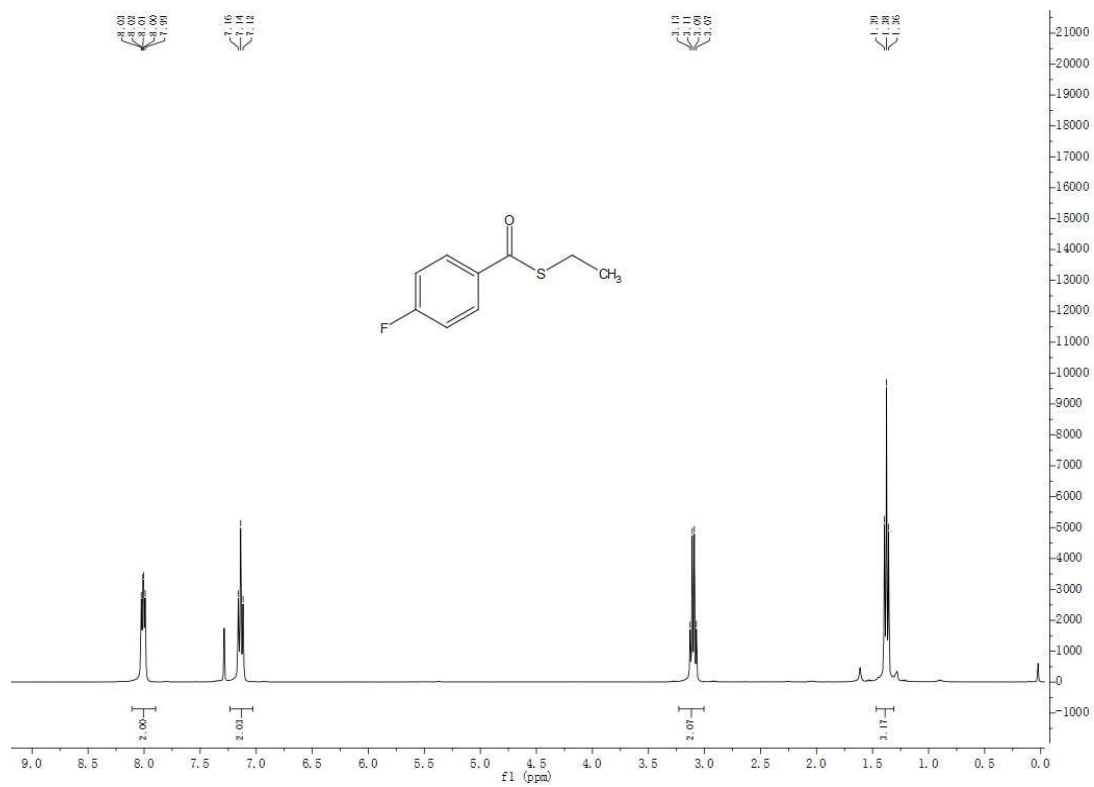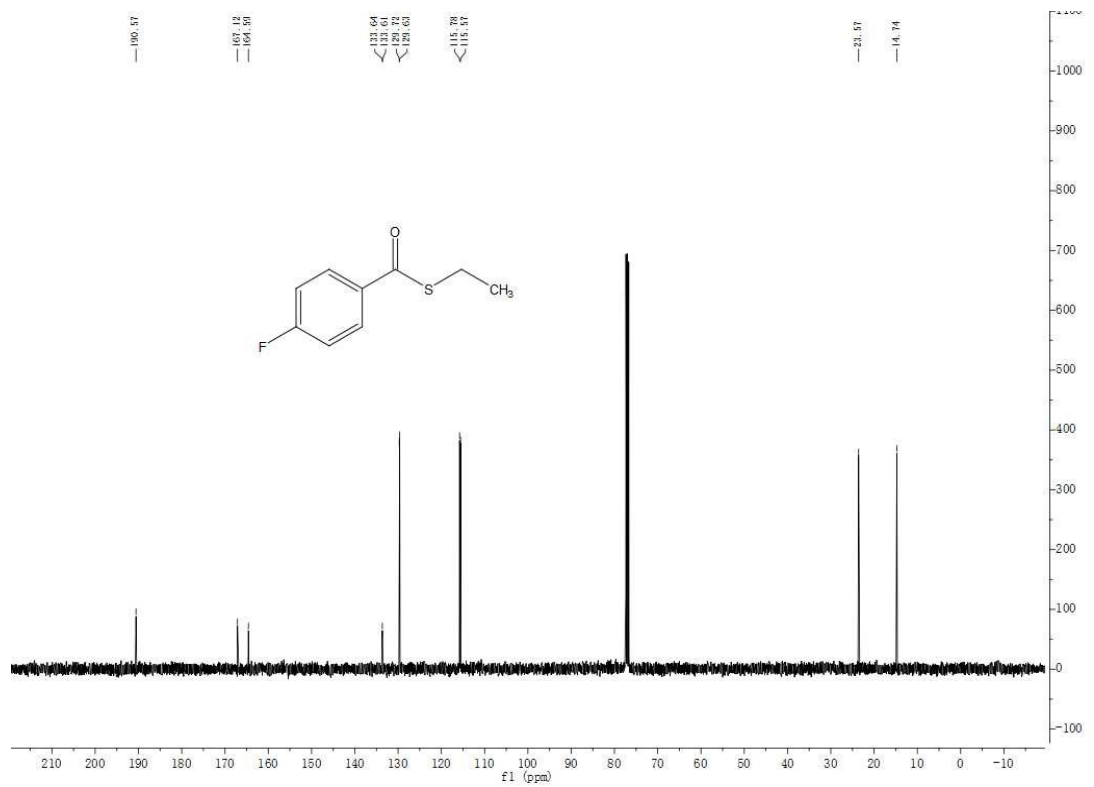

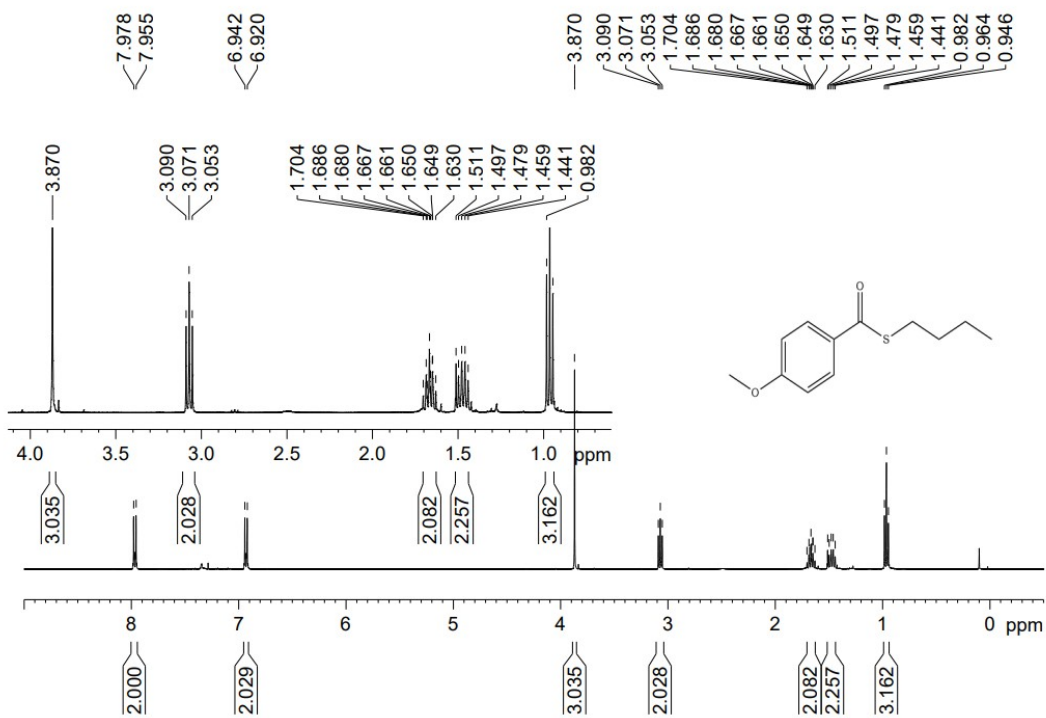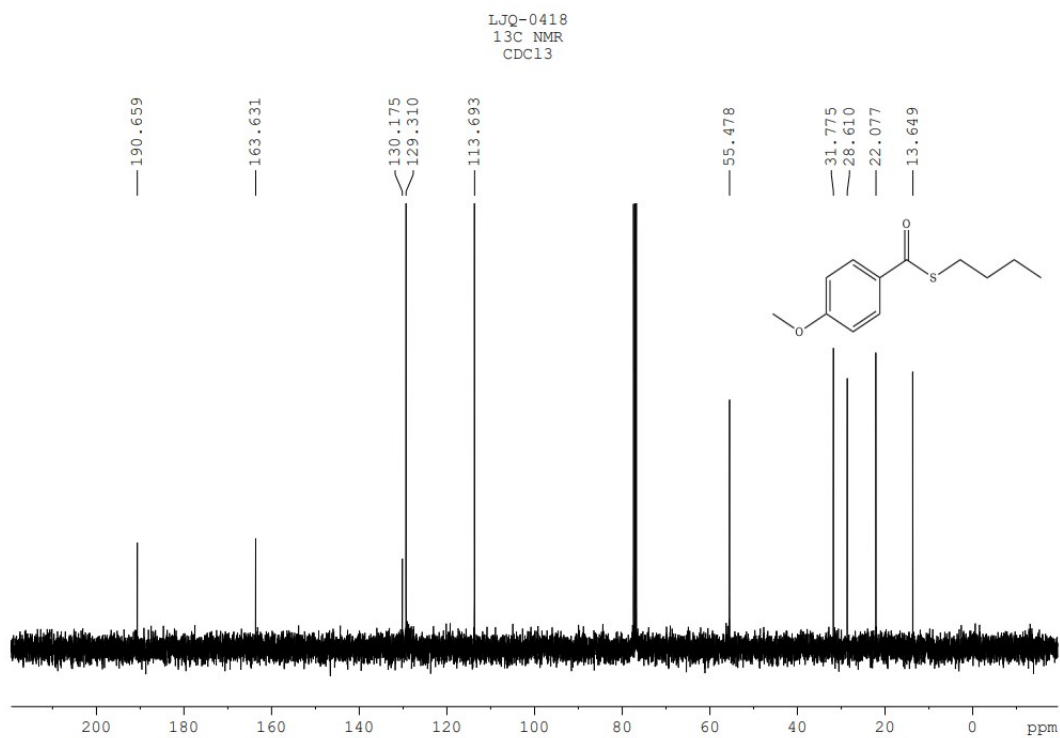

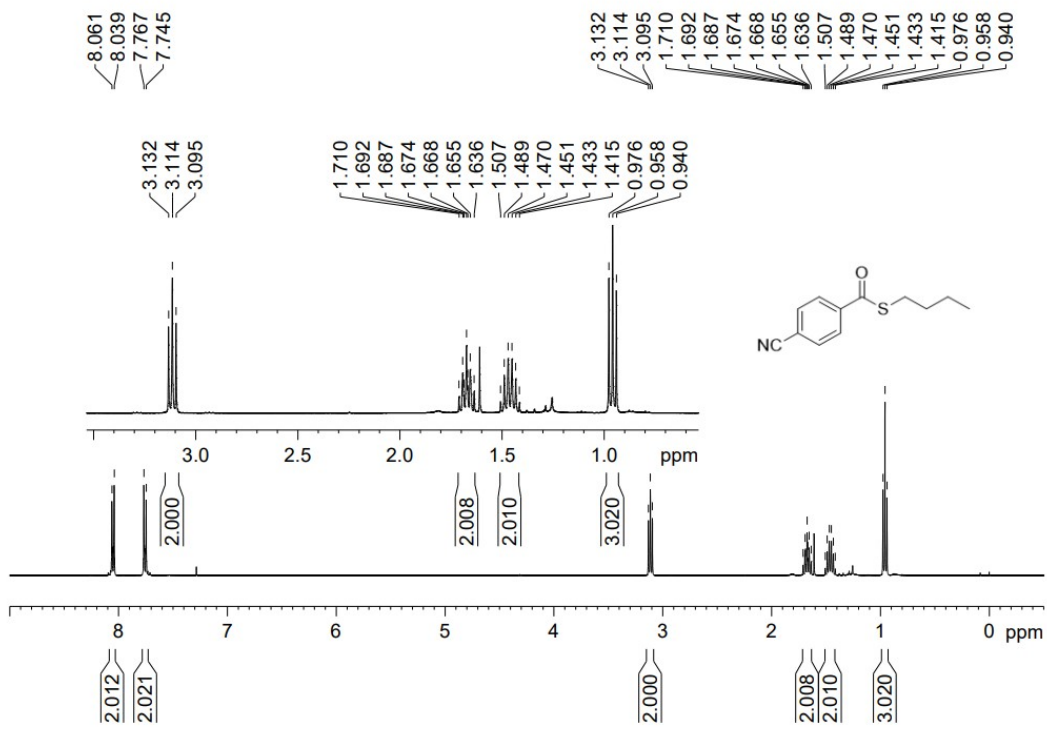

LJQ-041702  
<sup>13</sup>C NMR  
 CDC13

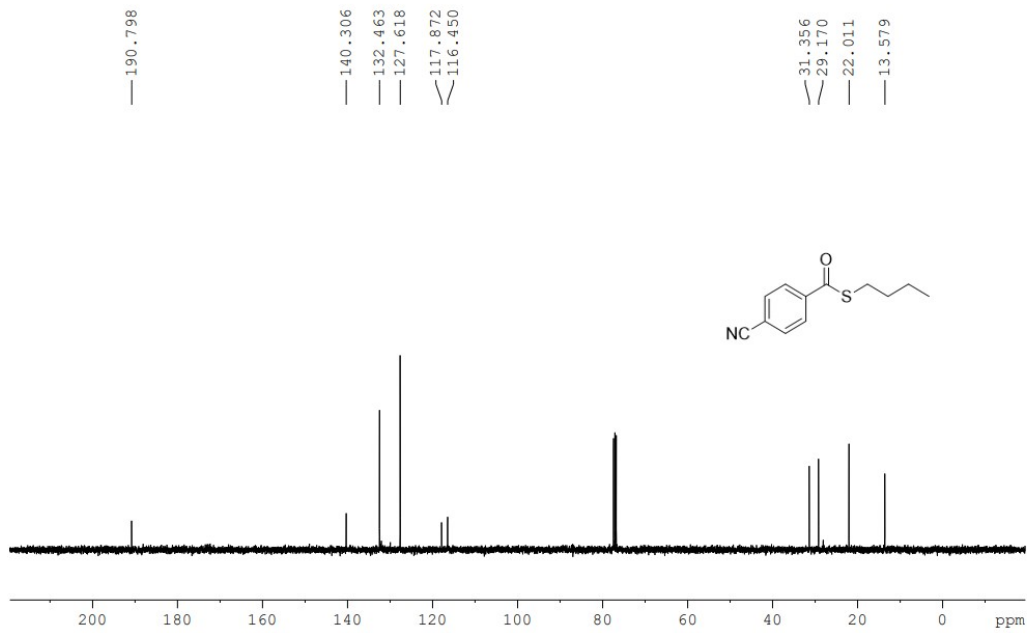



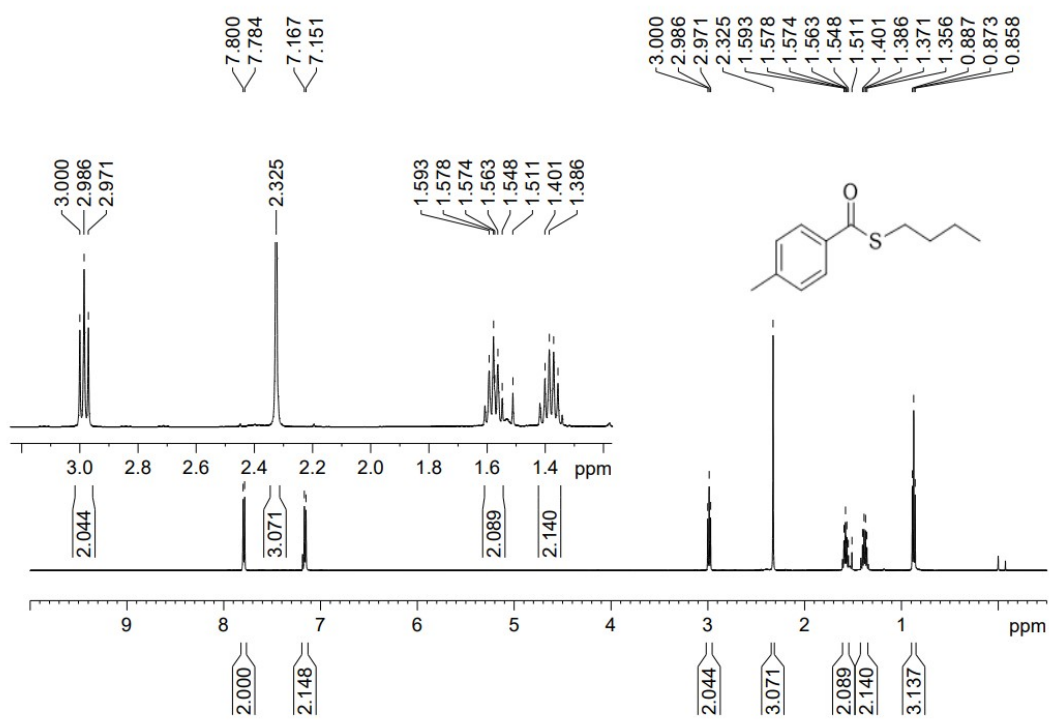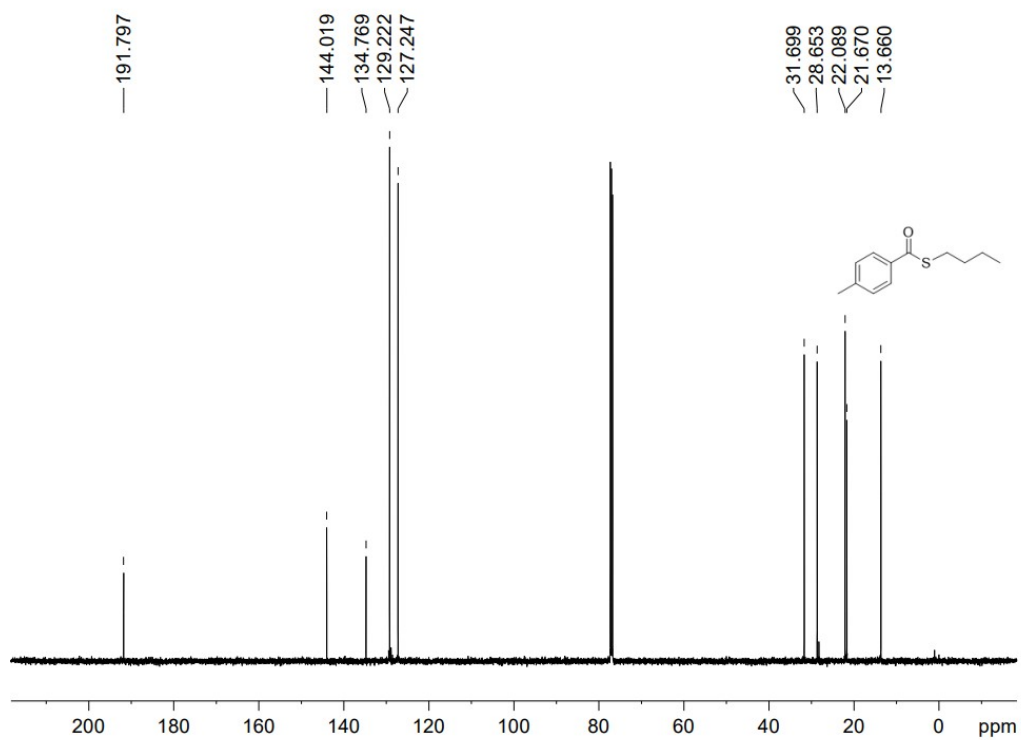

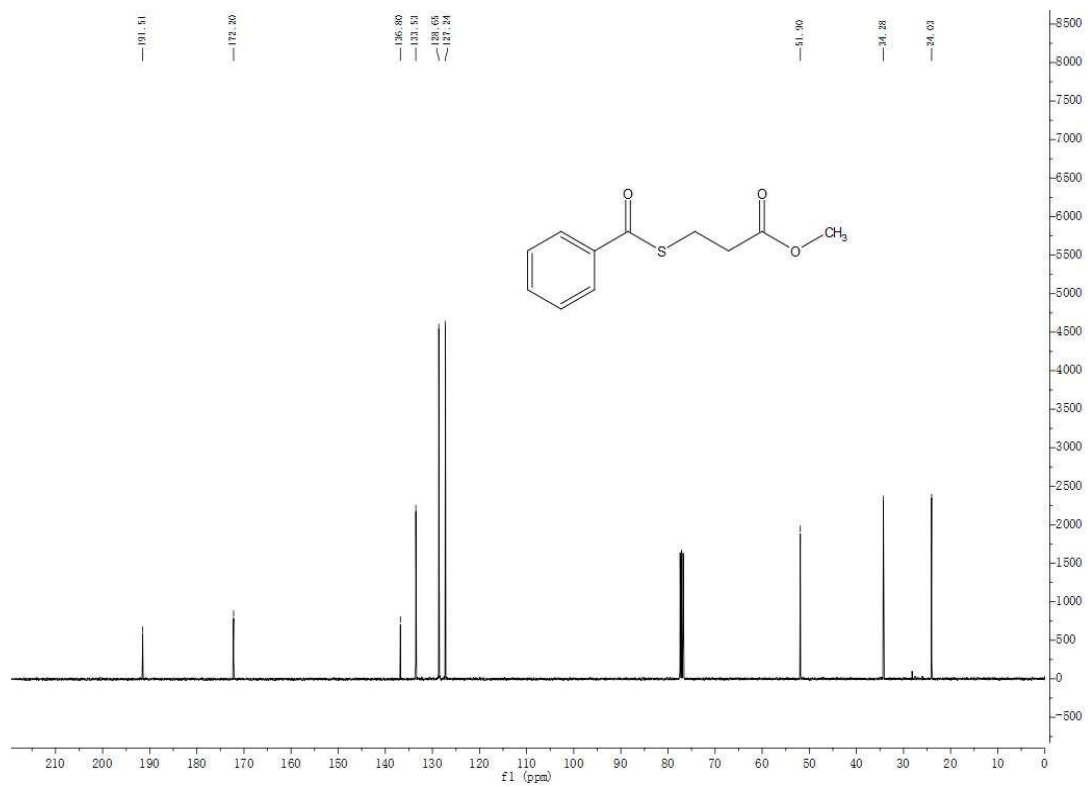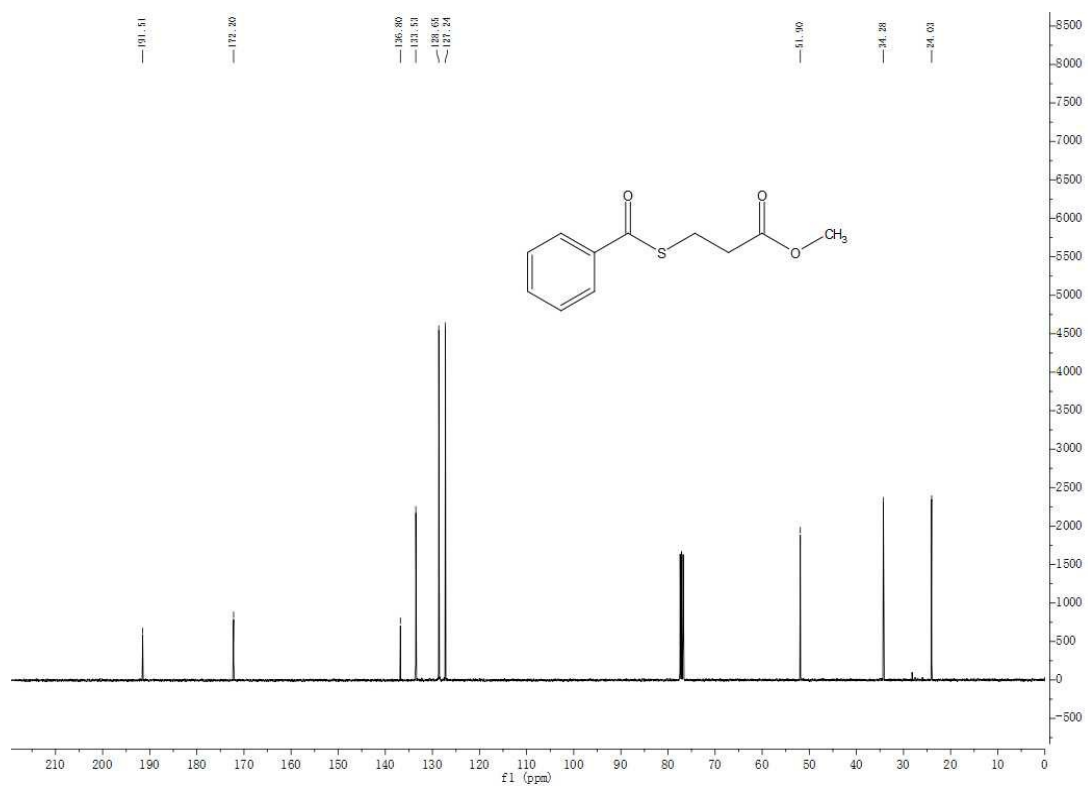

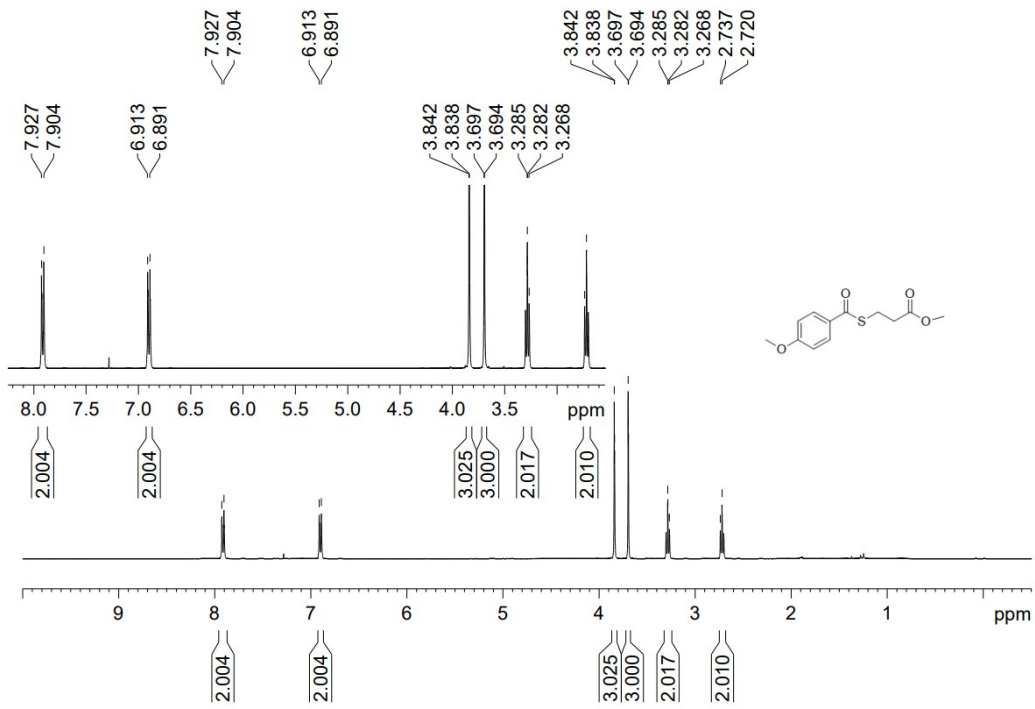

LJQ-042302  
<sup>13</sup>C NMR  
 CDC13

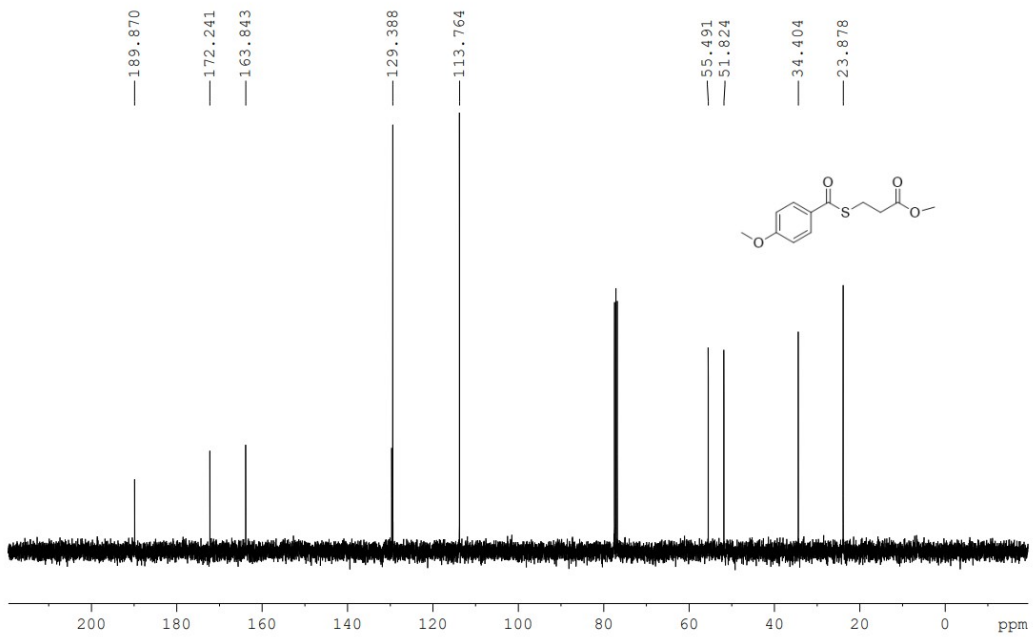

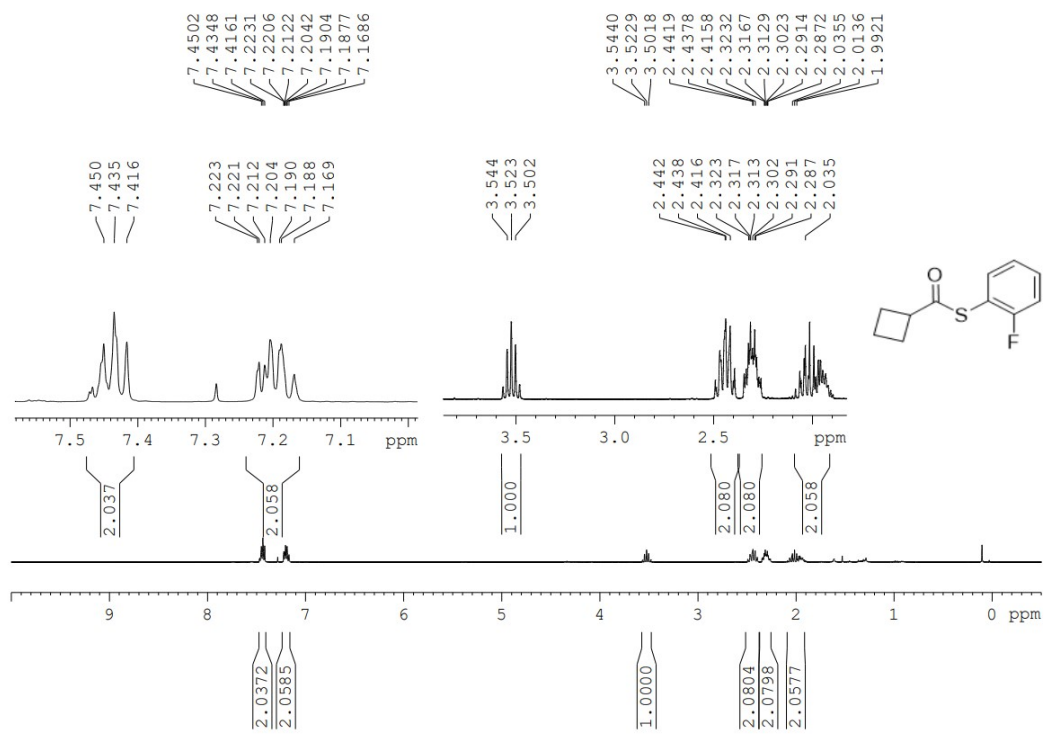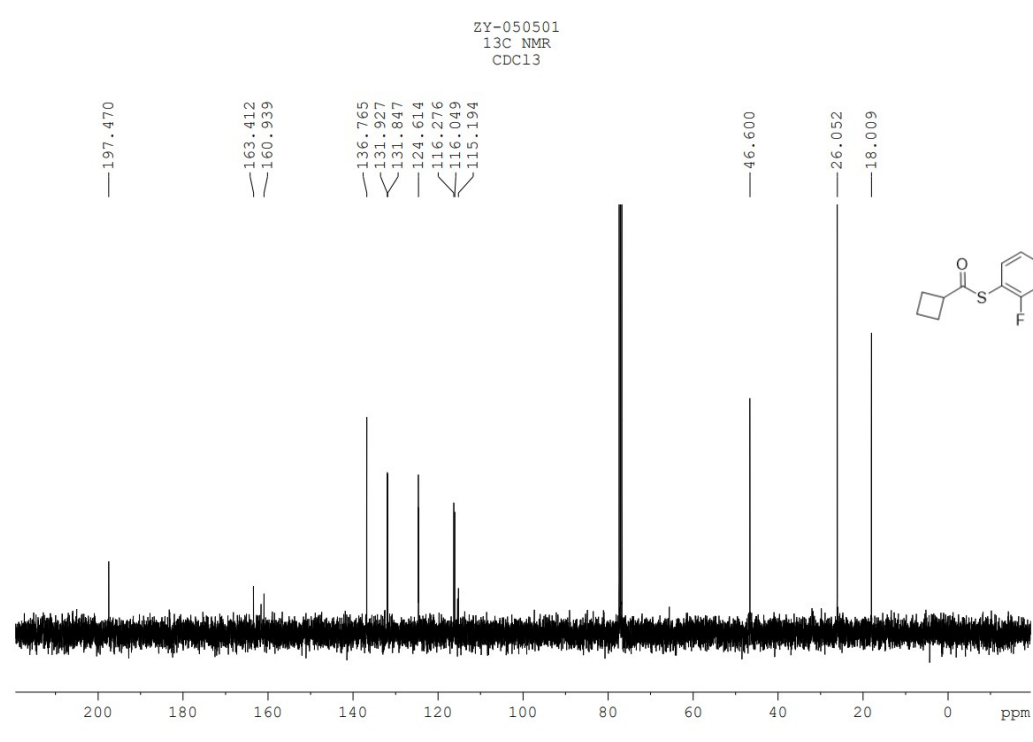

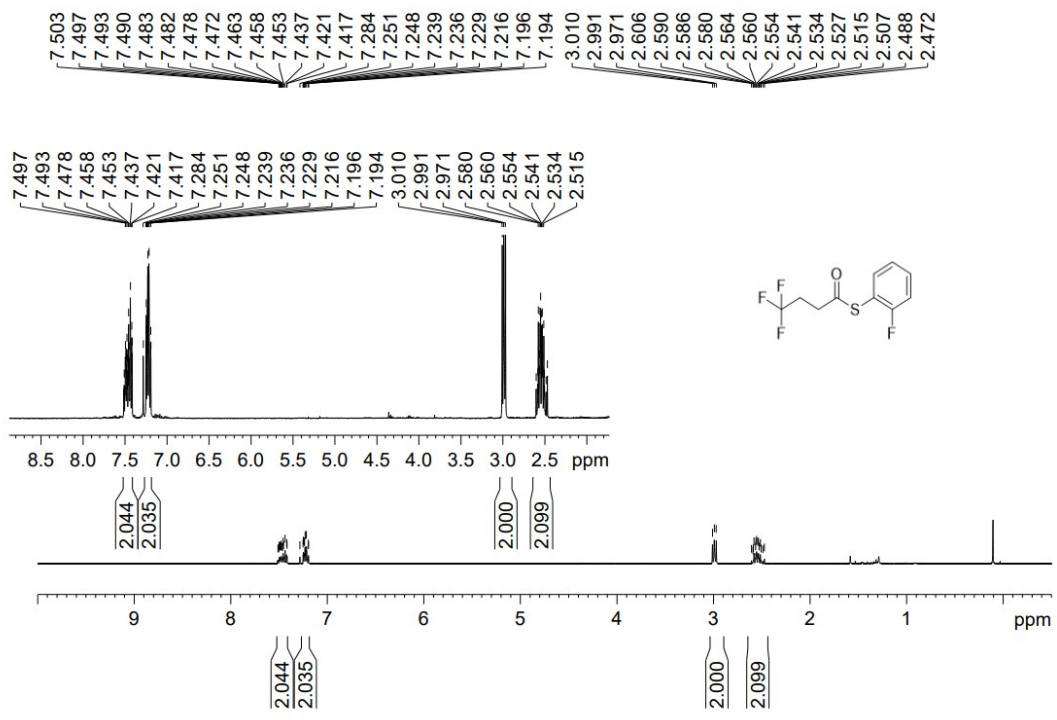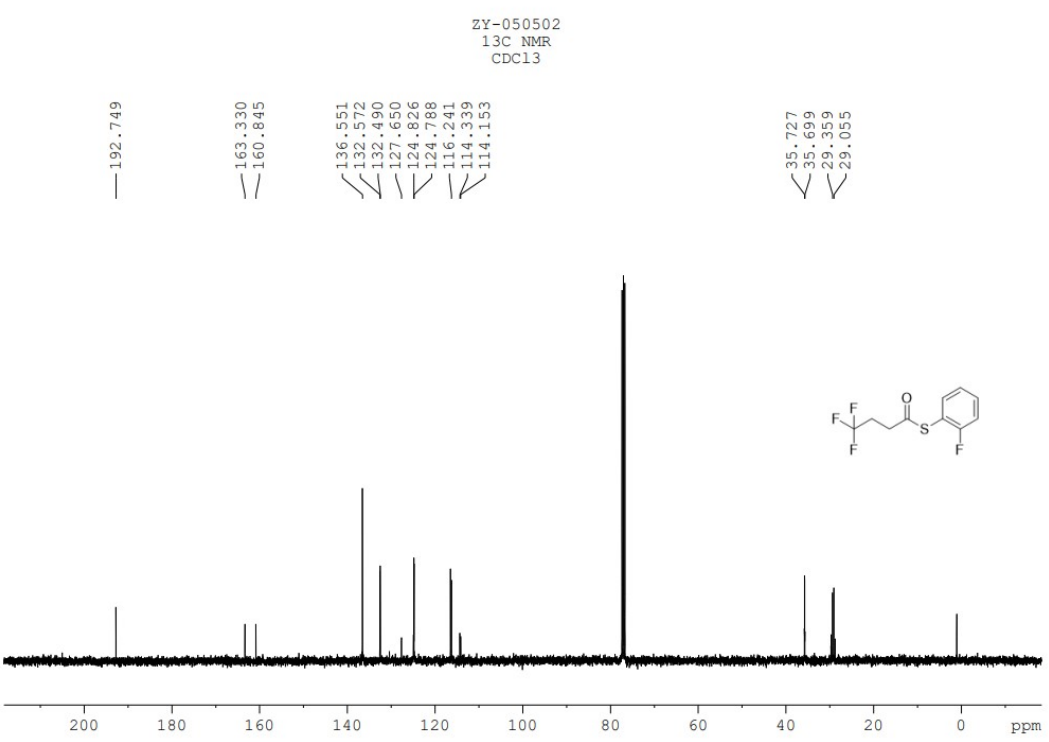

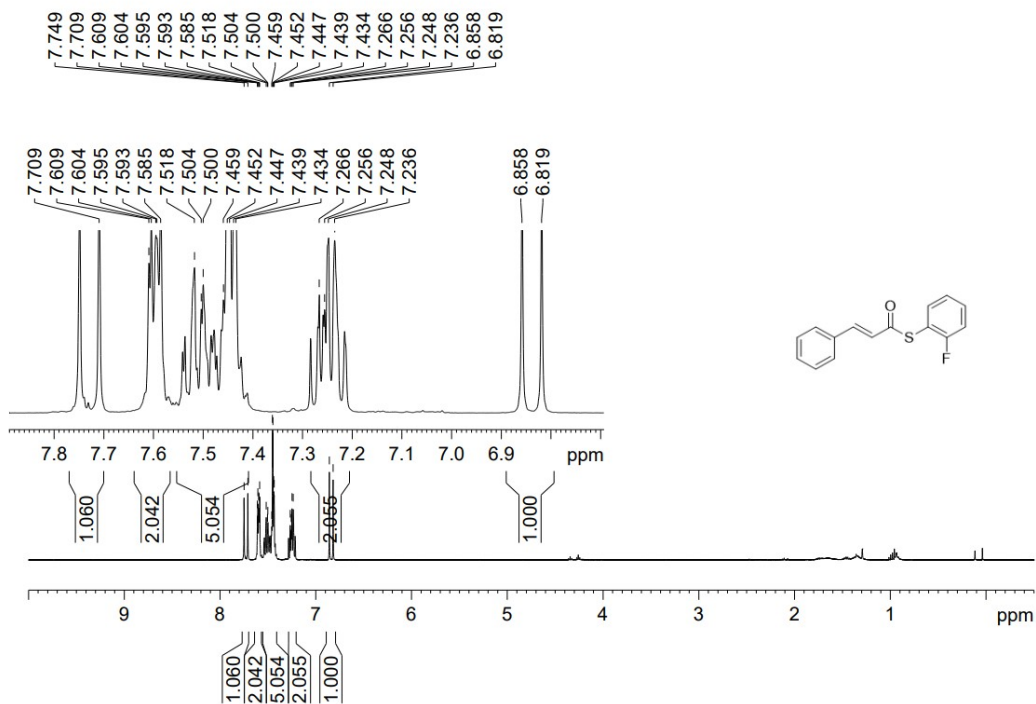

ZY-051002  
<sup>13</sup>C NMR  
 CDCl<sub>3</sub>

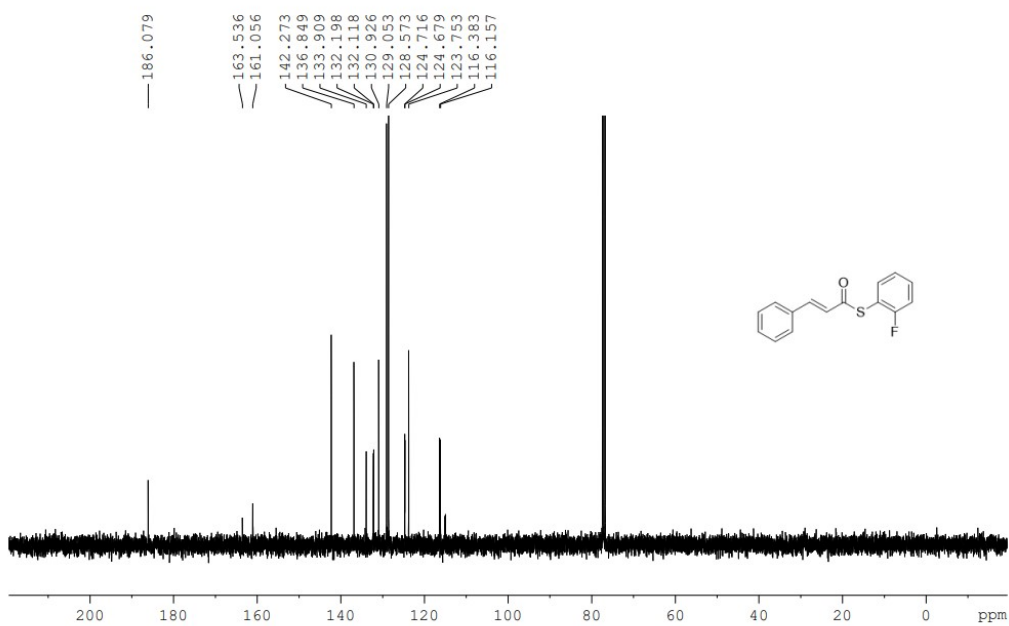

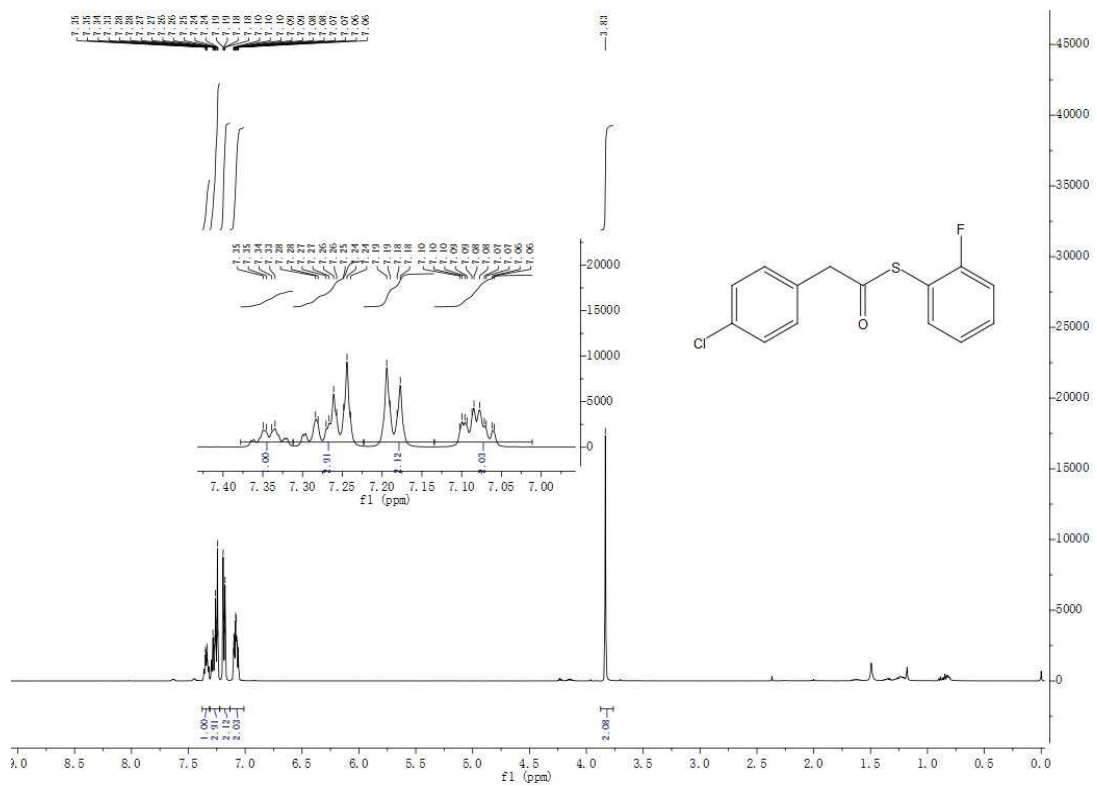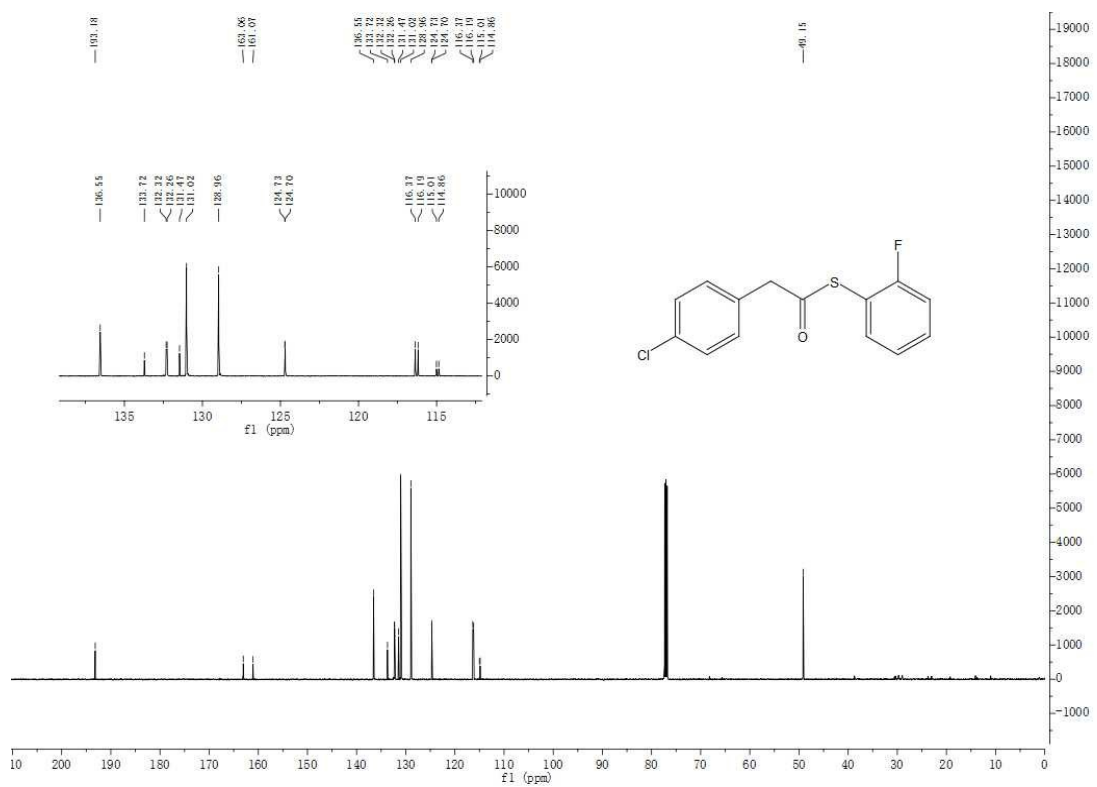

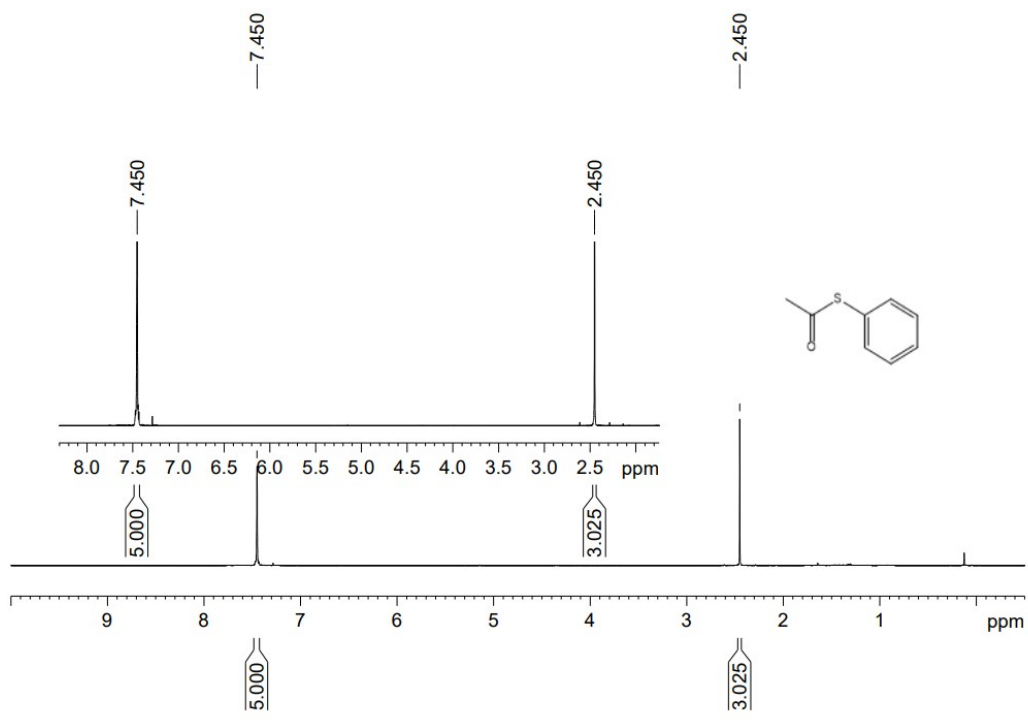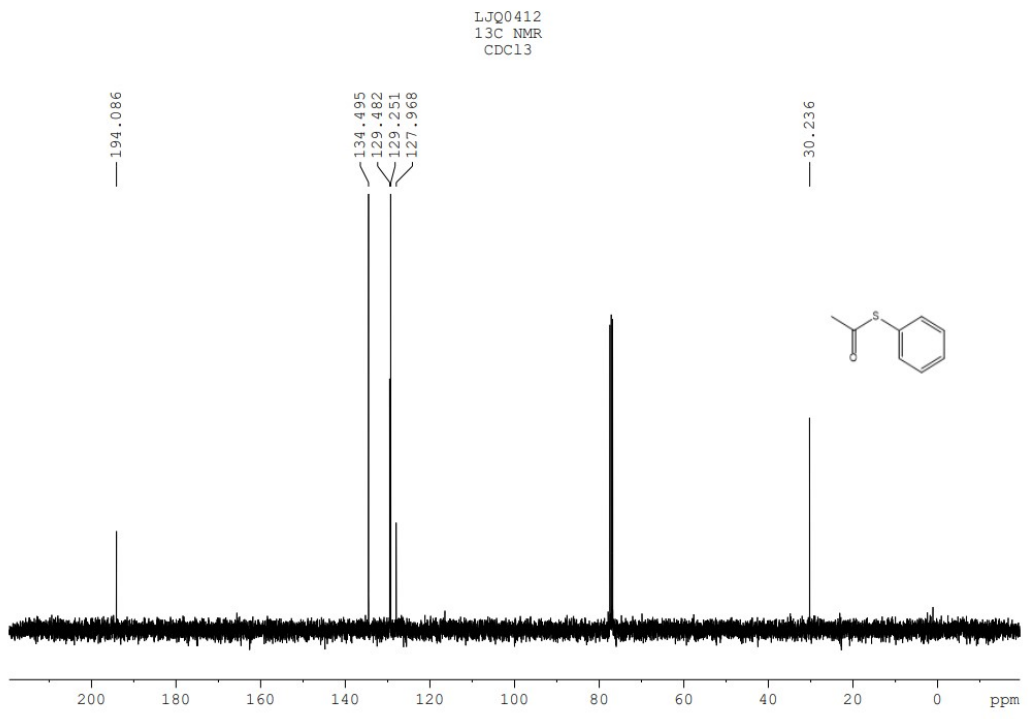



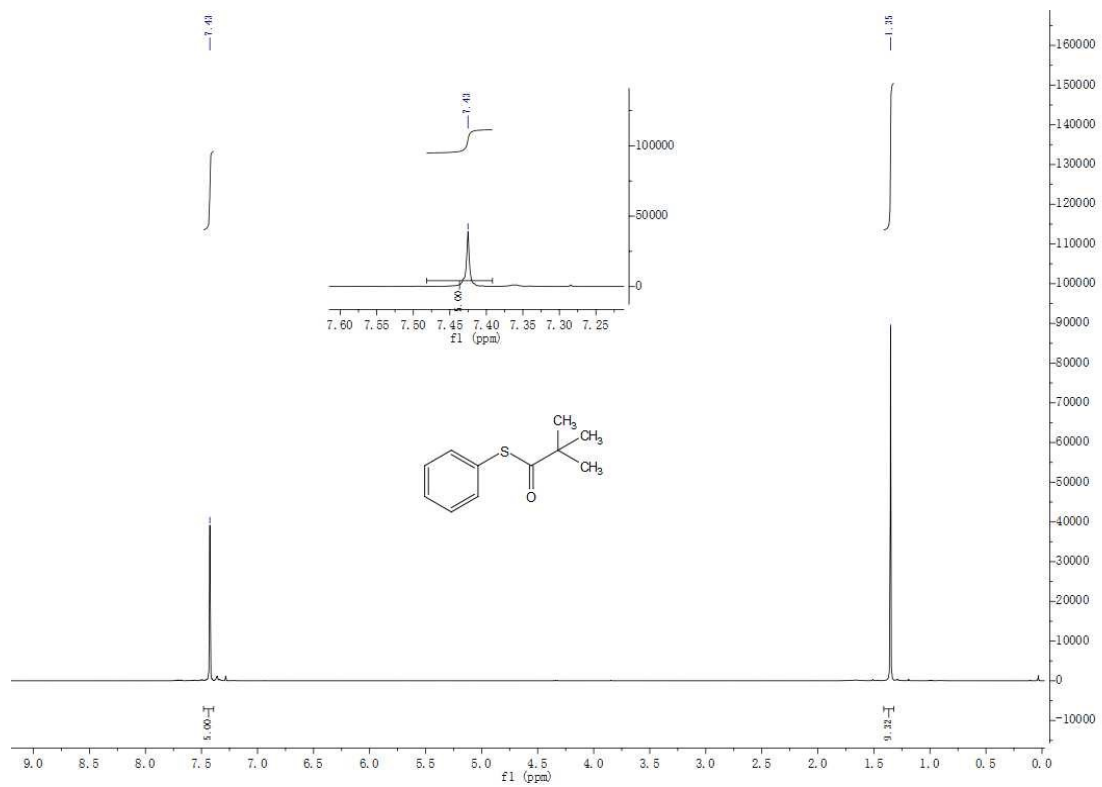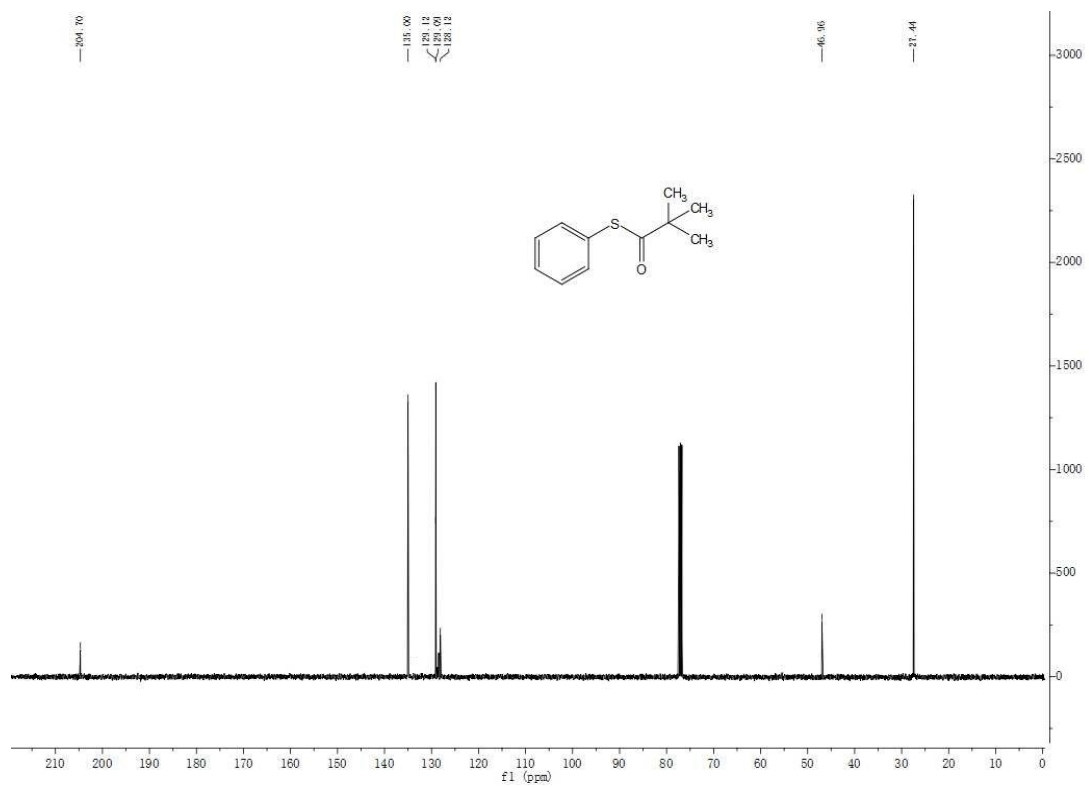

Supplement: d3nj02972g1.pdf [file d3nj02972g1.pdf]
